# Supplementary material for: CuI-catalyzed synthesis of multisubstituted pyrido[1,2-a]pyrimidin-4-ones through tandem Ullmann-type C–N cross-coupling and intramolecular amidation reaction
Source: Royal Society of Chemistry journal article supplement (doi:10.1039/d3ra04454h), 2023-01-01

## Supporting Information

### **CuI-Catalyzed Synthesis of Multisubstituted Pyrido[1,2-*a*]pyrimidin-4-ones Through Tandem Ullmann-type C–N Cross-Coupling and Intramolecular Amidation Reaction**

Baichuan Mo,<sup>a,b</sup> Chunxia Chen,<sup>\*,a,b</sup> and Jinsong Peng,<sup>\*,a</sup>

<sup>a</sup> College of Chemistry, Chemical Engineering and Resource Utilization, Northeast Forestry University, No. 26 Hexing Road, Harbin, 150040, P. R. China.

<sup>b</sup> Material Science and Engineering College, Northeast Forestry University, No. 26 Hexing Road, Harbin, 150040, P. R. China.

\*E-mail: ccx1759@163.com, jspeng1998@nefu.edu.cn

#### **Content**

|                                                                                       |      |
|---------------------------------------------------------------------------------------|------|
| 1. Copies of <sup>1</sup> H NMR and <sup>13</sup> C NMR spectra of the products ..... | S-2  |
| 2. High-resolution mass spectra of new compounds.....                                 | S-27 |
| 3. IR spectra of new compounds.....                                                   | S-29 |

# 1. Copies of $^1\text{H}$ NMR and $^{13}\text{C}$ NMR spectra of the products

## 2-Phenyl-4H-pyrido[1,2-a]pyrimidin-4-one(3aa)

$^1\text{H}$  spectrum of 3aa

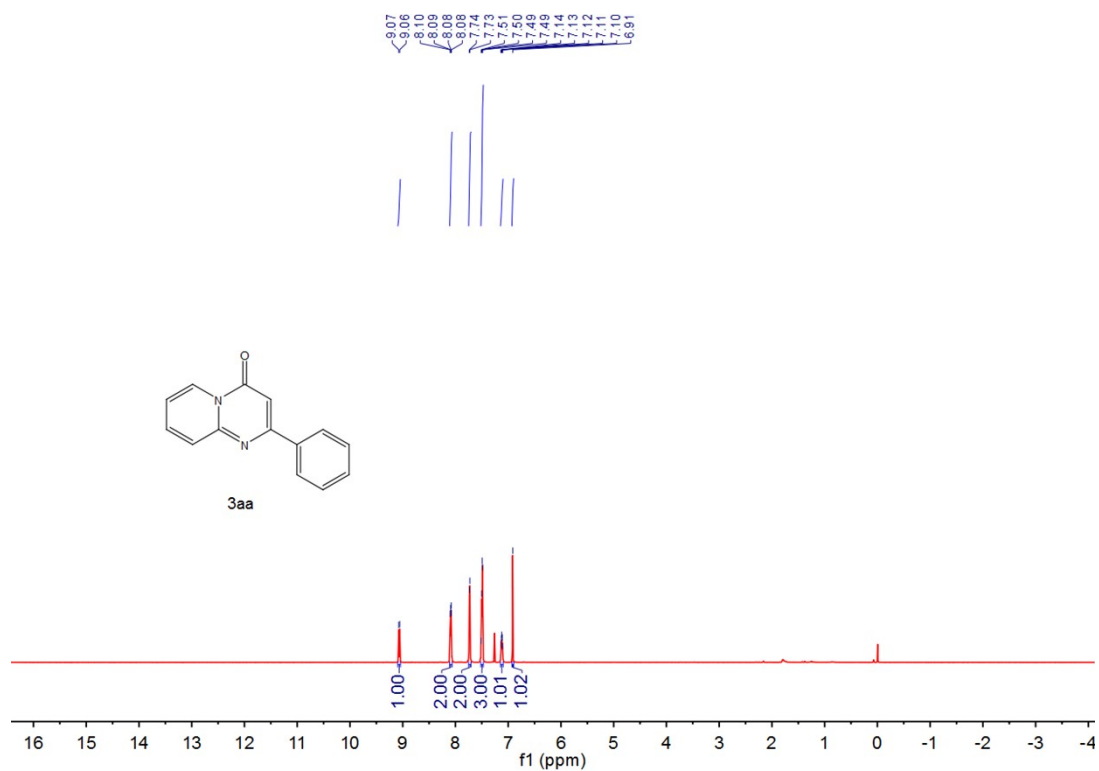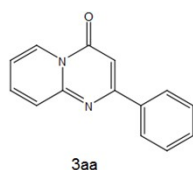

$^{13}\text{C}$  spectrum of 3aa

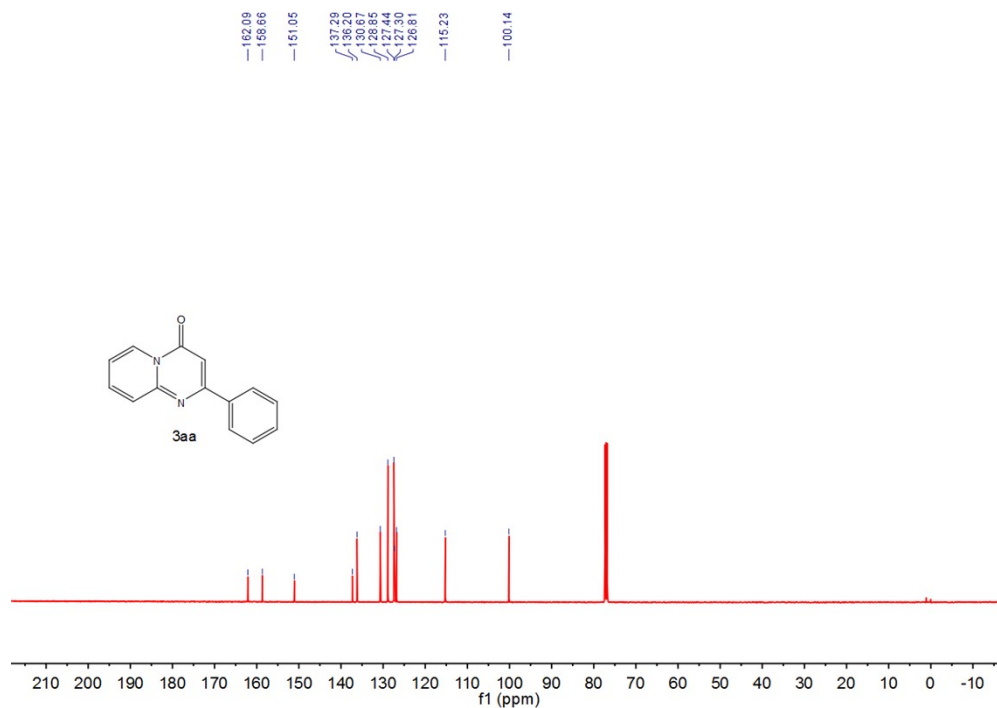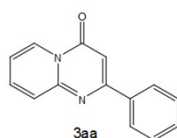

## 2-(o-tolyl)-4H-pyrido[1,2-a]pyrimidin-4-one(3ab)

### <sup>1</sup>H spectrum of **3ab**

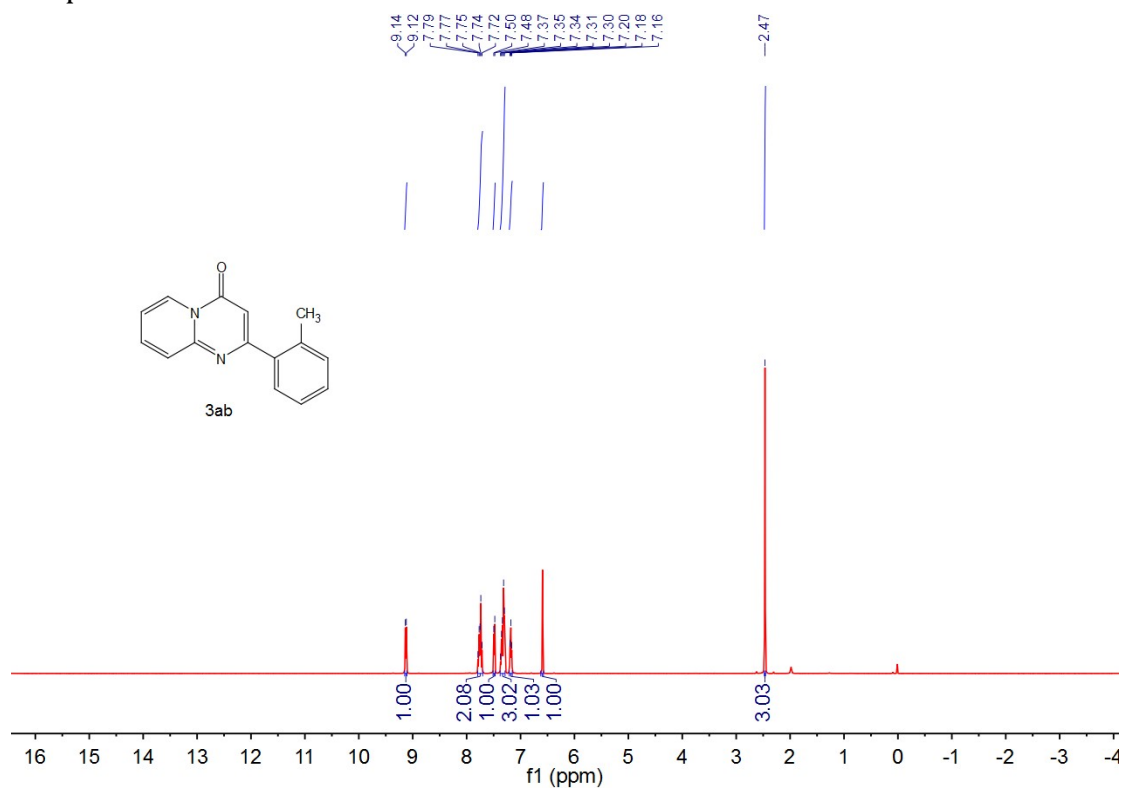

### <sup>13</sup>C spectrum of **3ab**

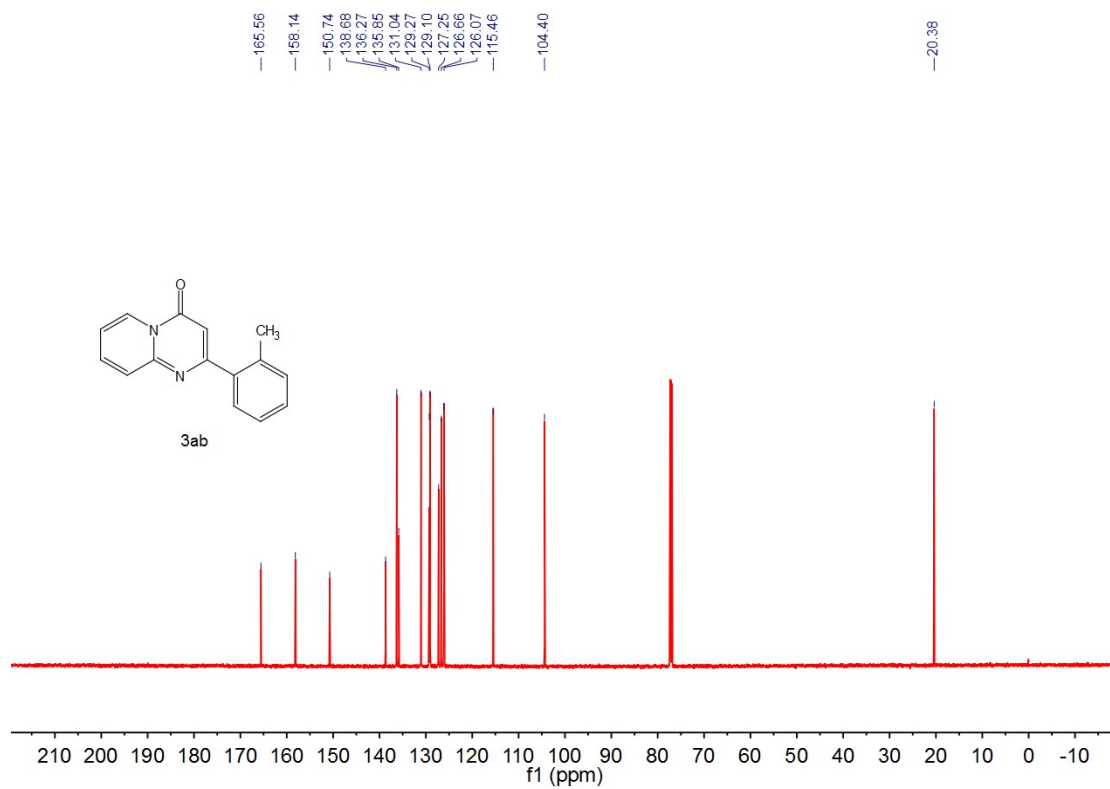

### 2-(*m*-tolyl)-4H-pyrido[1,2-*a*]pyrimidin-4-one (**3ac**)

### <sup>1</sup>H spectrum of **3ac**

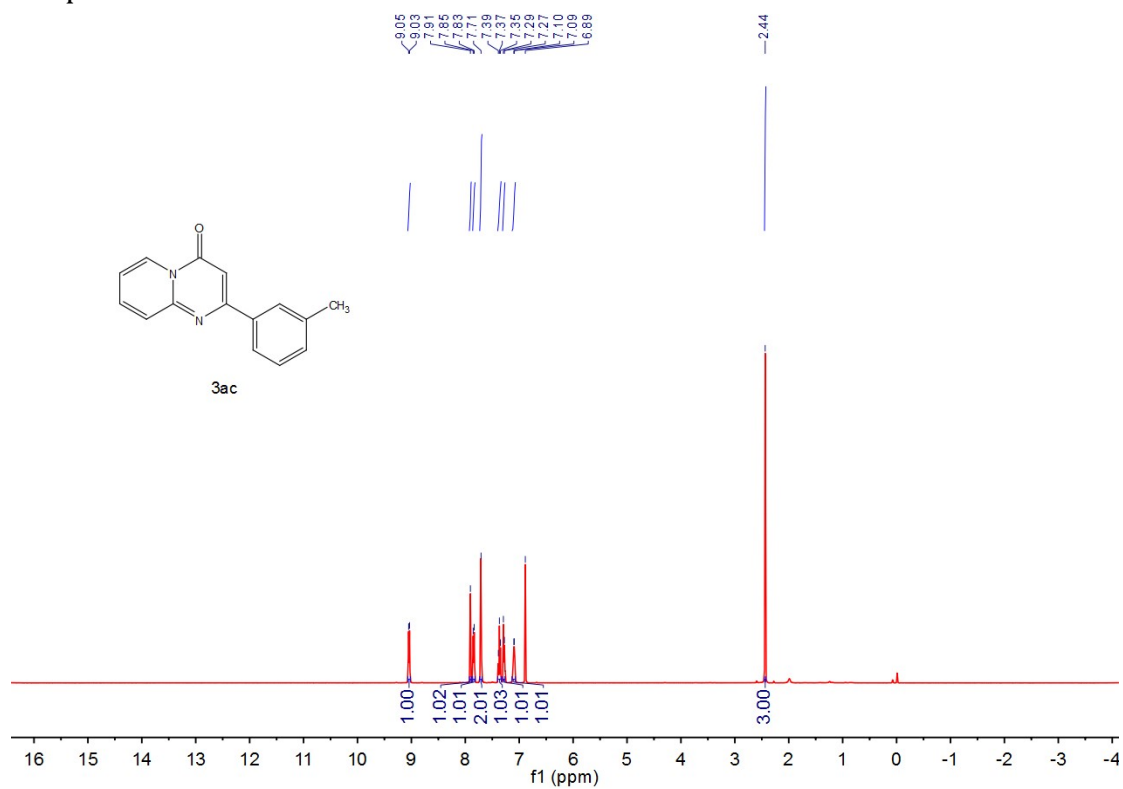

### <sup>13</sup>C spectrum of **3ac**

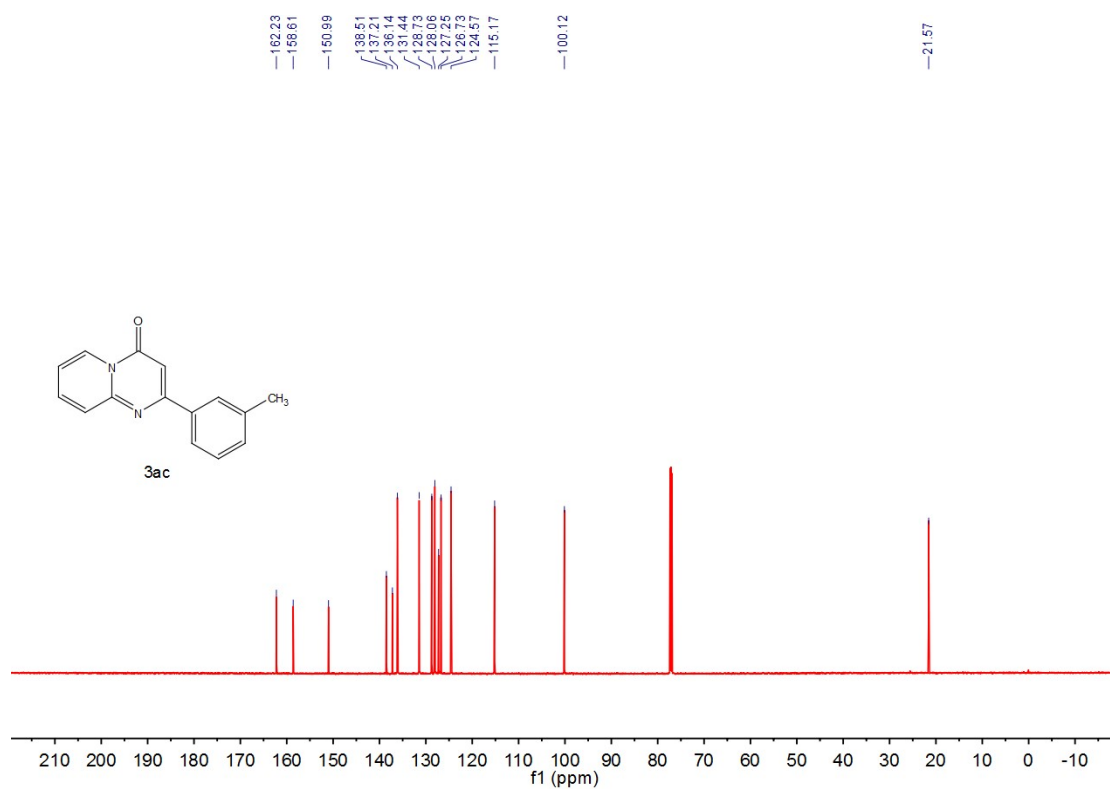

### 2-(p-tolyl)-4H-pyrido[1,2-a]pyrimidin-4-one (**3ad**)

### <sup>1</sup>H spectrum of **3ad**

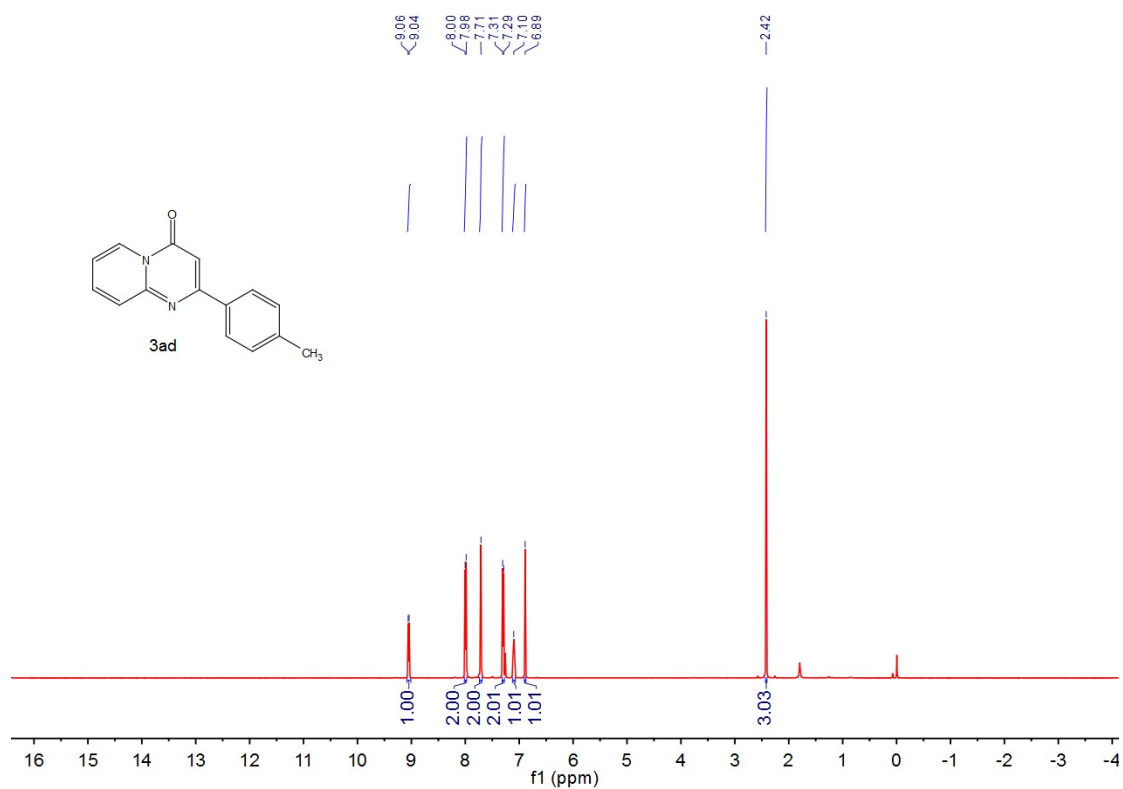

### <sup>13</sup>C spectrum of **3ad**

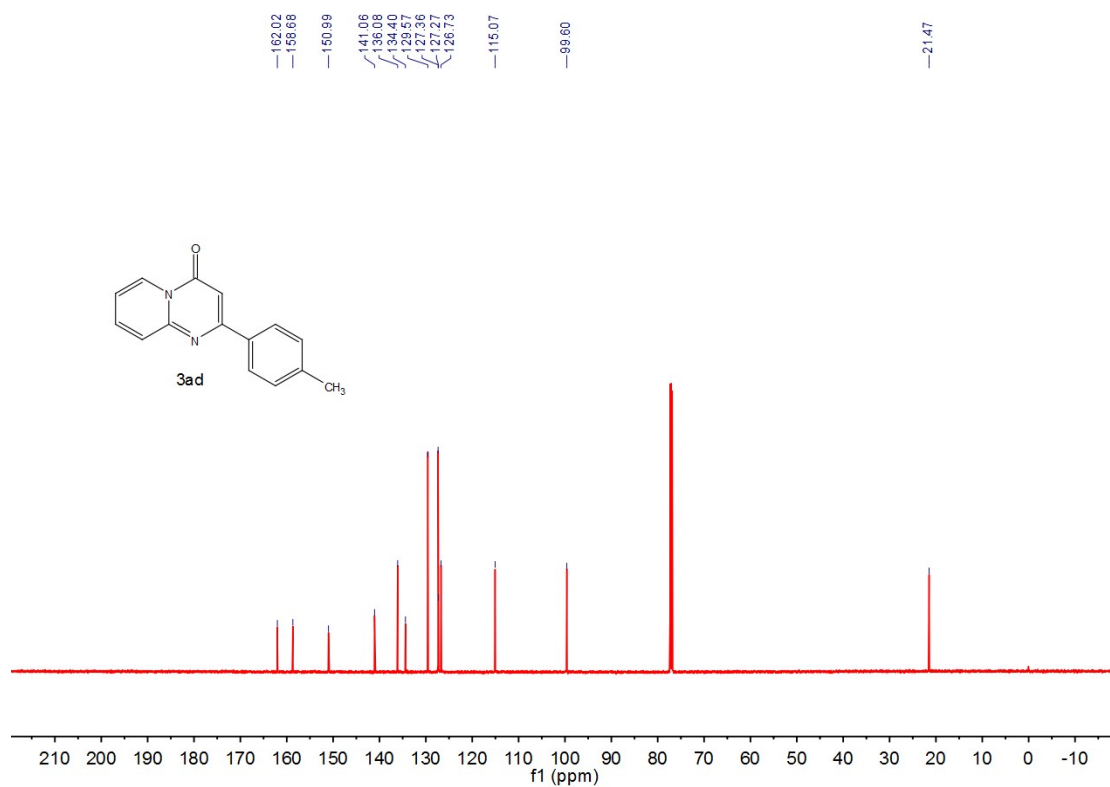

### 2-(4-Methoxyphenyl)-4H-pyrido[1,2-a]pyrimidin-4-one(**3ae**)

#### <sup>1</sup>H spectrum of **3ae**

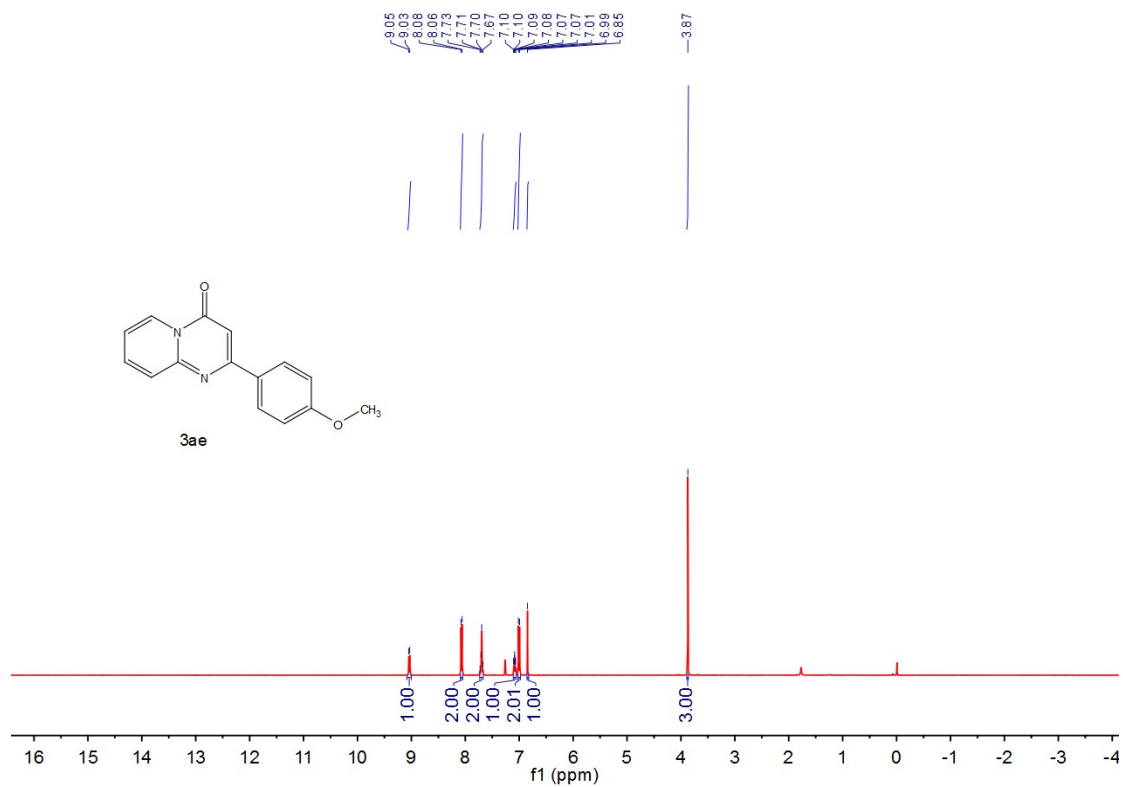

**<sup>13</sup>C spectrum of 3ae**

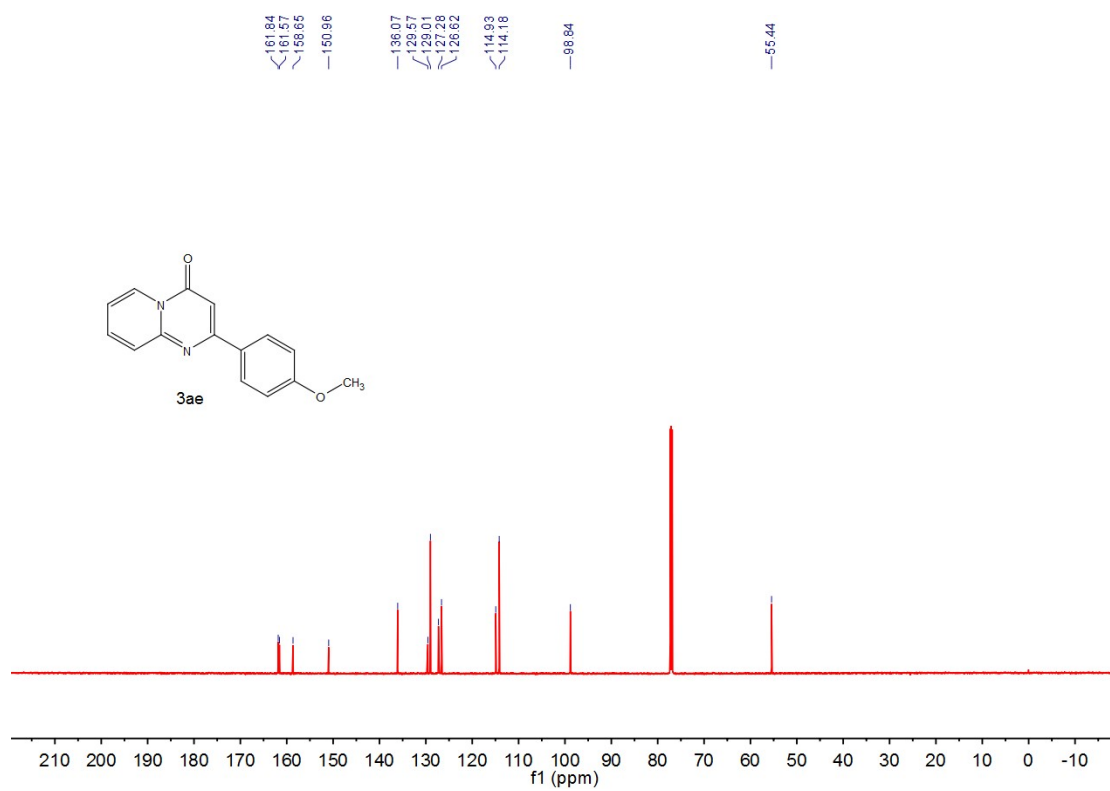

**2-(3-Methoxyphenyl)-4H-pyrido[1,2-a]pyrimidin-4-one (3af)**

**<sup>1</sup>H spectrum of 3af**

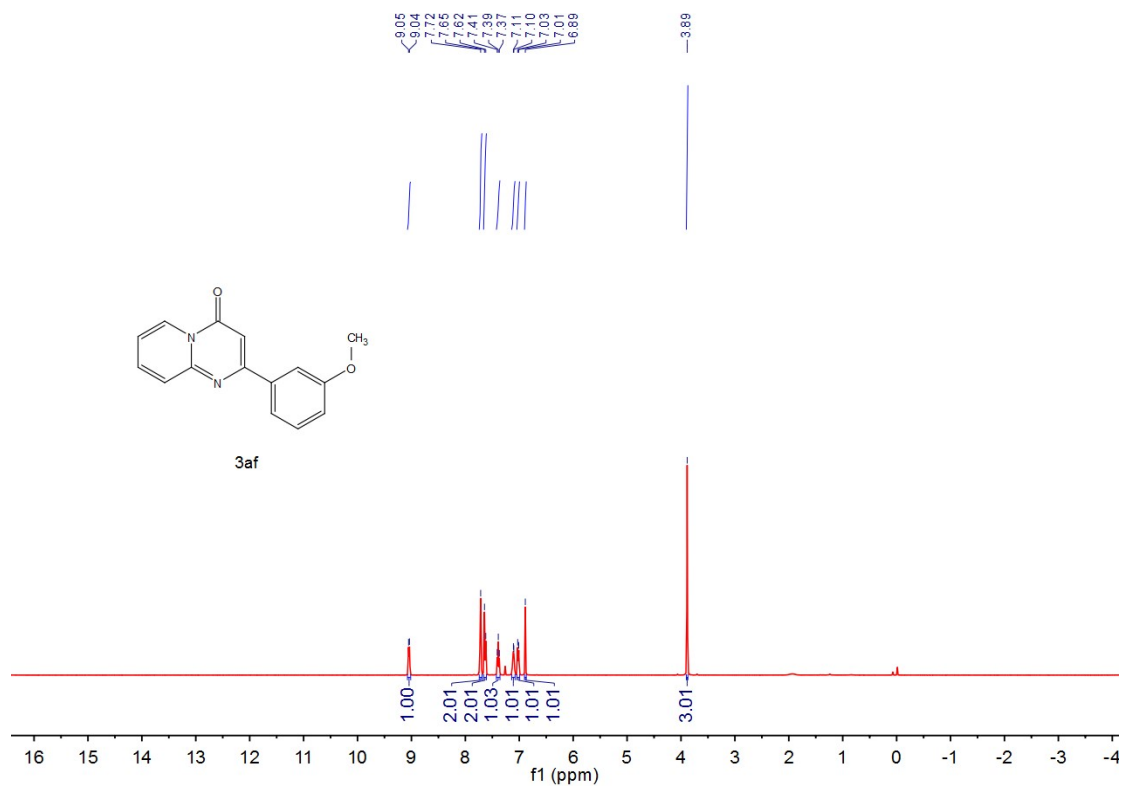

**<sup>13</sup>C spectrum of 3af**

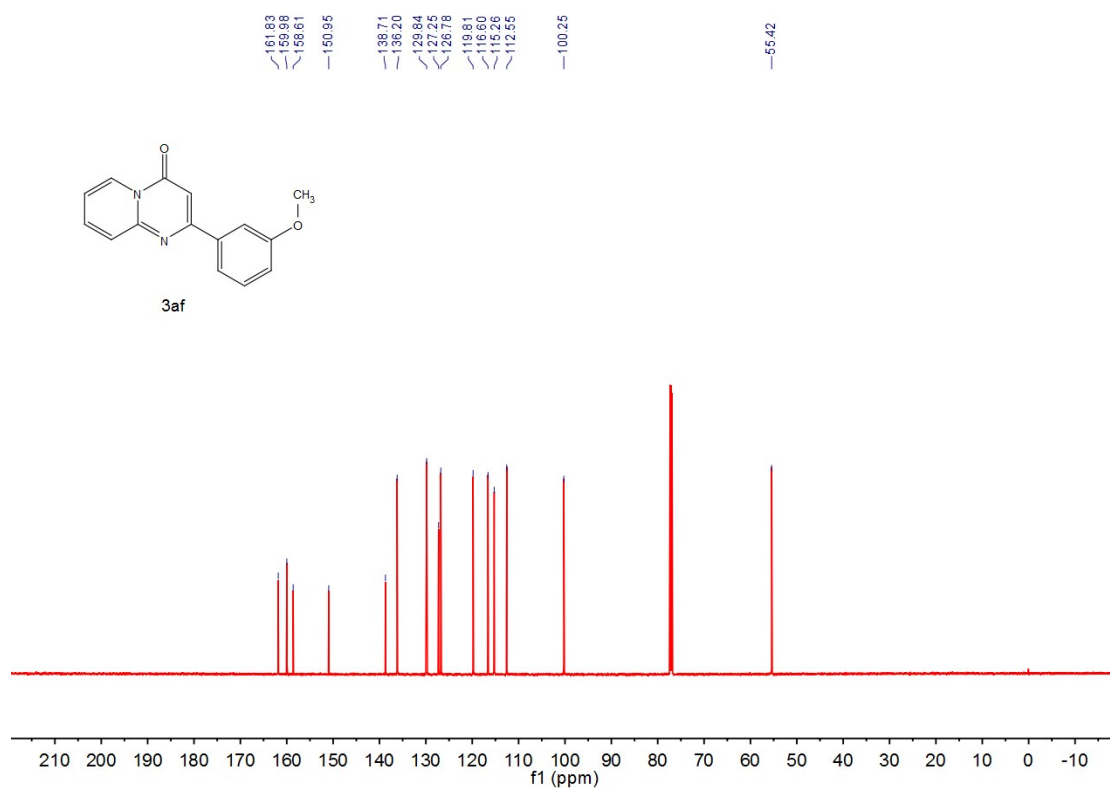

**2-(4-Chlorophenyl)-4H-pyrido[1,2-a]pyrimidin-4-one(3ag)**

**<sup>1</sup>H spectrum of 3ag**

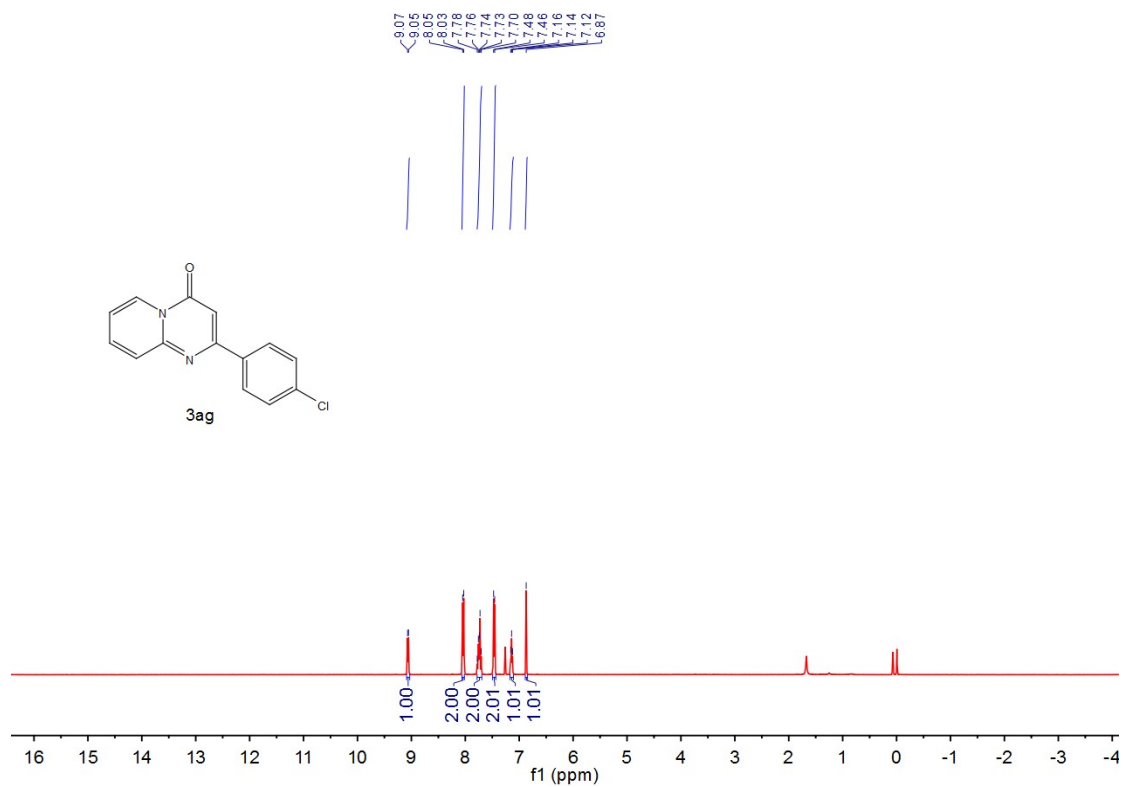

<sup>13</sup>C spectrum of **3ag**

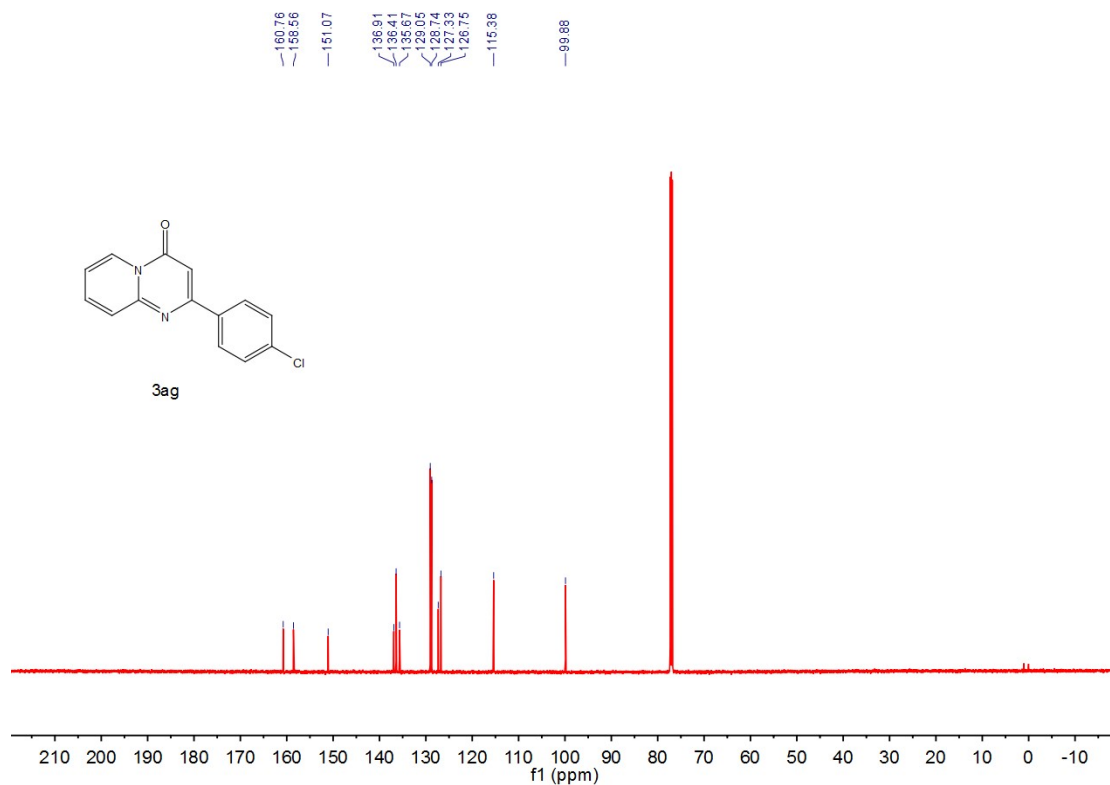

*2-(3-Chlorophenyl)-4H-pyrido[1,2-a]pyrimidin-4-one* (**3ah**)

<sup>1</sup>H spectrum of **3ah**



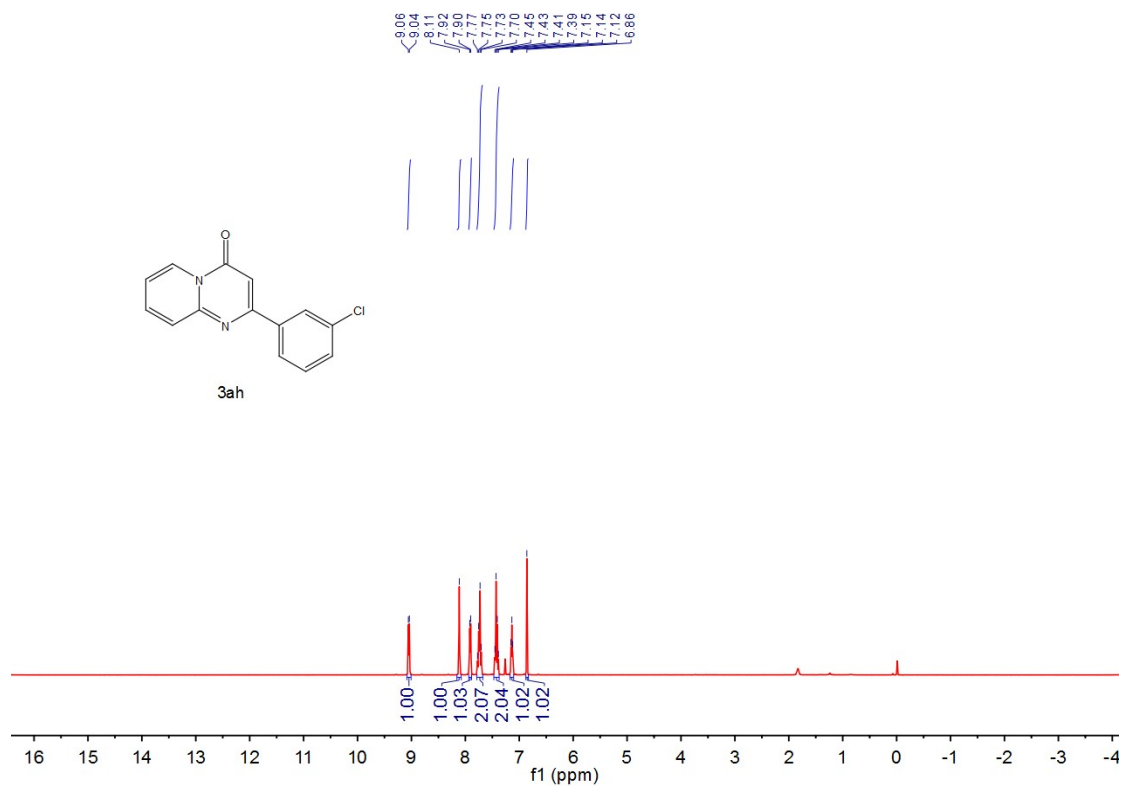

<sup>13</sup>C spectrum of **3ah**

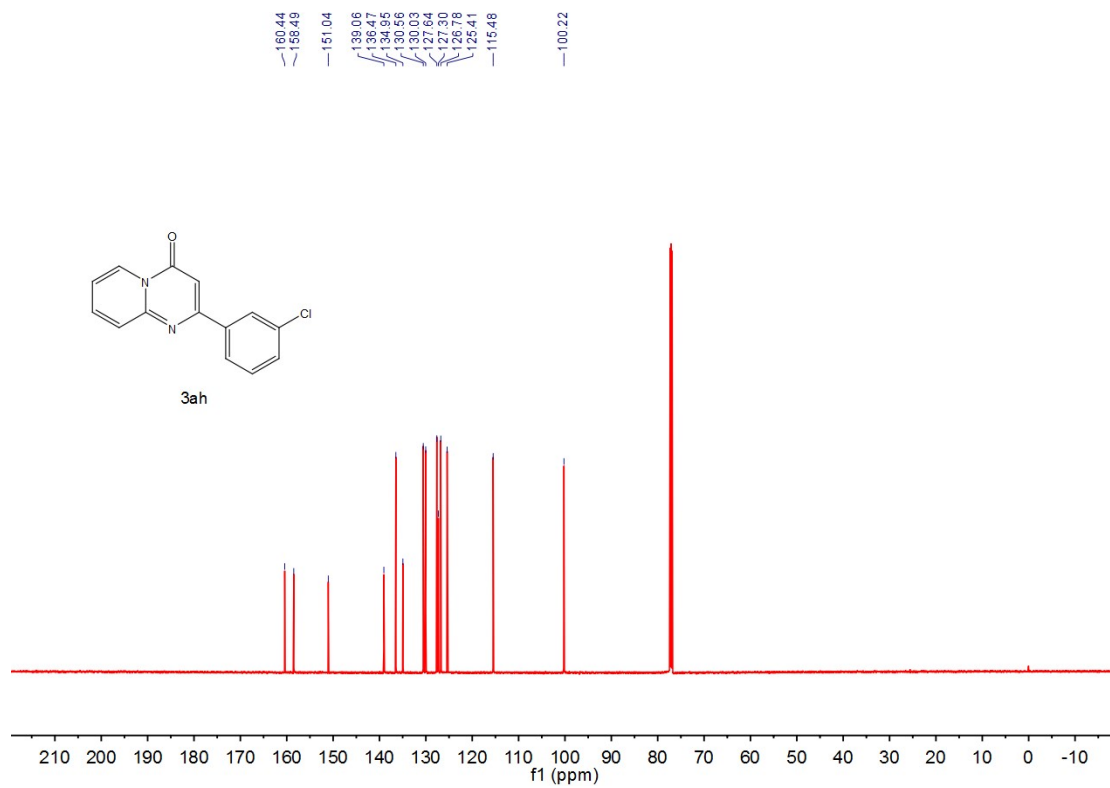

2-(2-Chlorophenyl)-4H-pyrido[1,2-a]pyrimidin-4-one (**3ai**)

<sup>1</sup>H spectrum of **3ai**

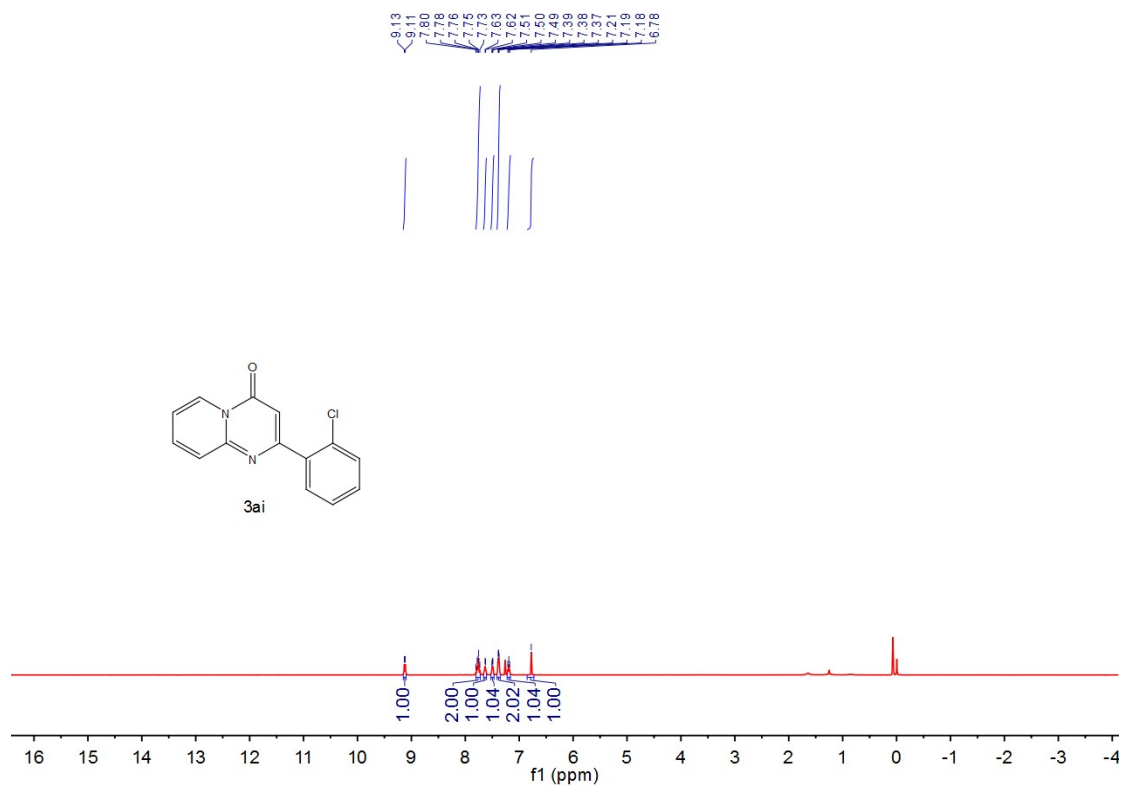

<sup>13</sup>C spectrum of **3ai**

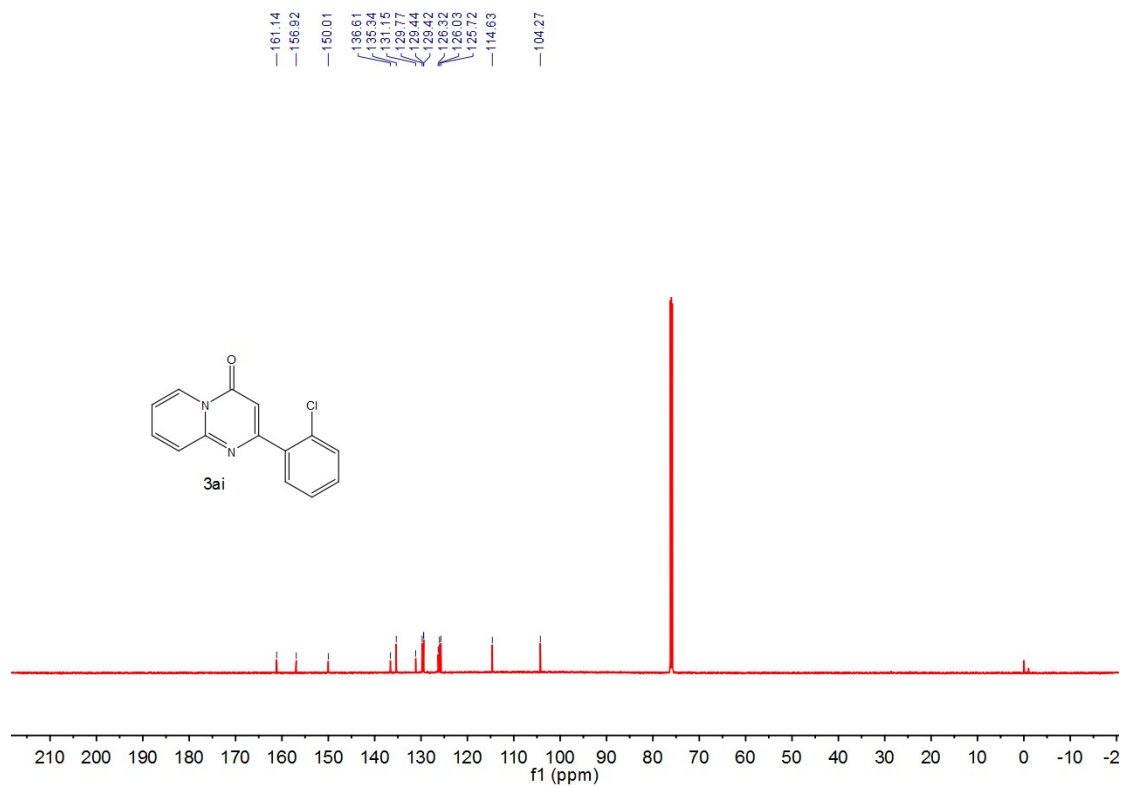

**2-(4-Fluorophenyl)-4H-pyrido[1,2-a]pyrimidin-4-one(3aj)**

<sup>1</sup>H spectrum of **3aj**

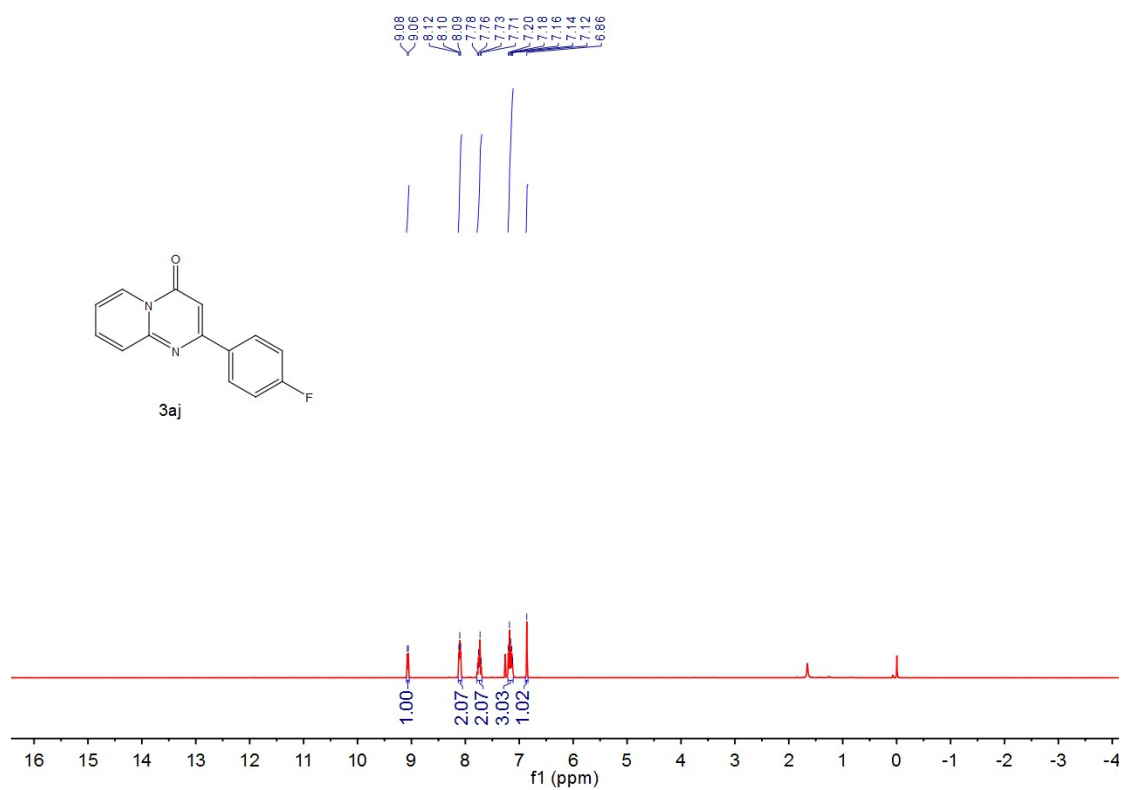

**<sup>13</sup>C spectrum of 3aj**

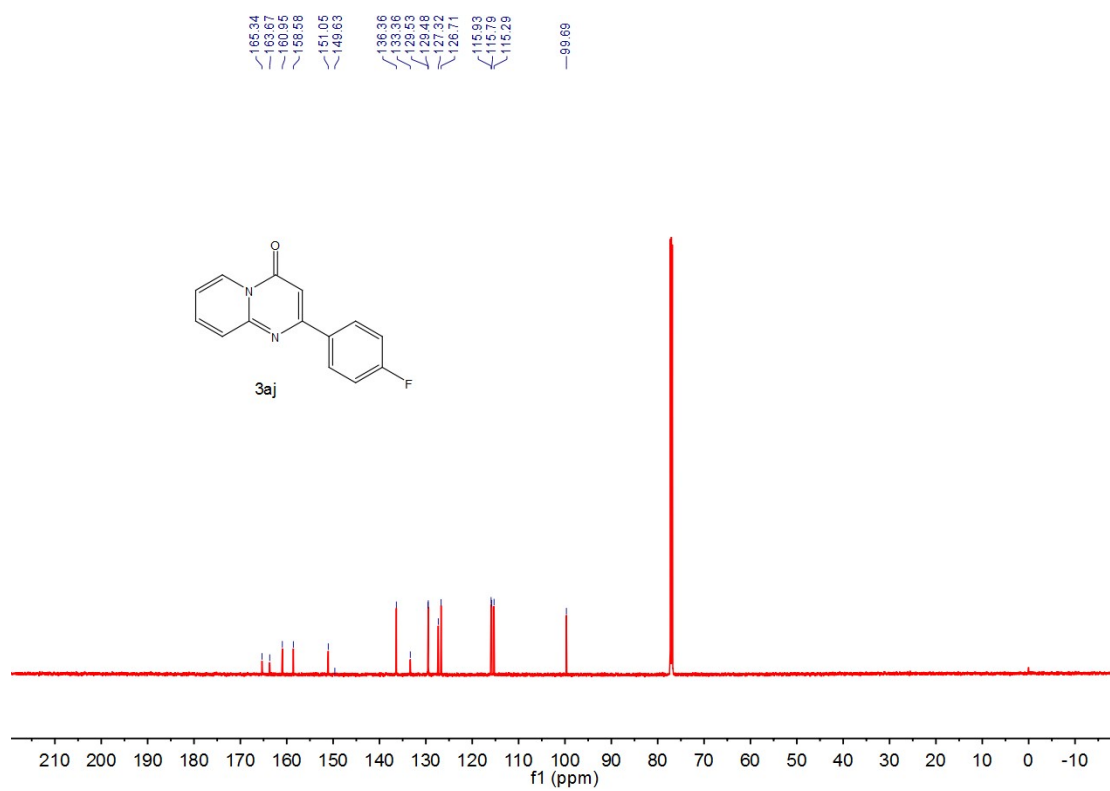

**2-(3-Fluorophenyl)-4H-pyrido[1,2-a]pyrimidin-4-one (3ak)**

**<sup>1</sup>H spectrum of 3ak**

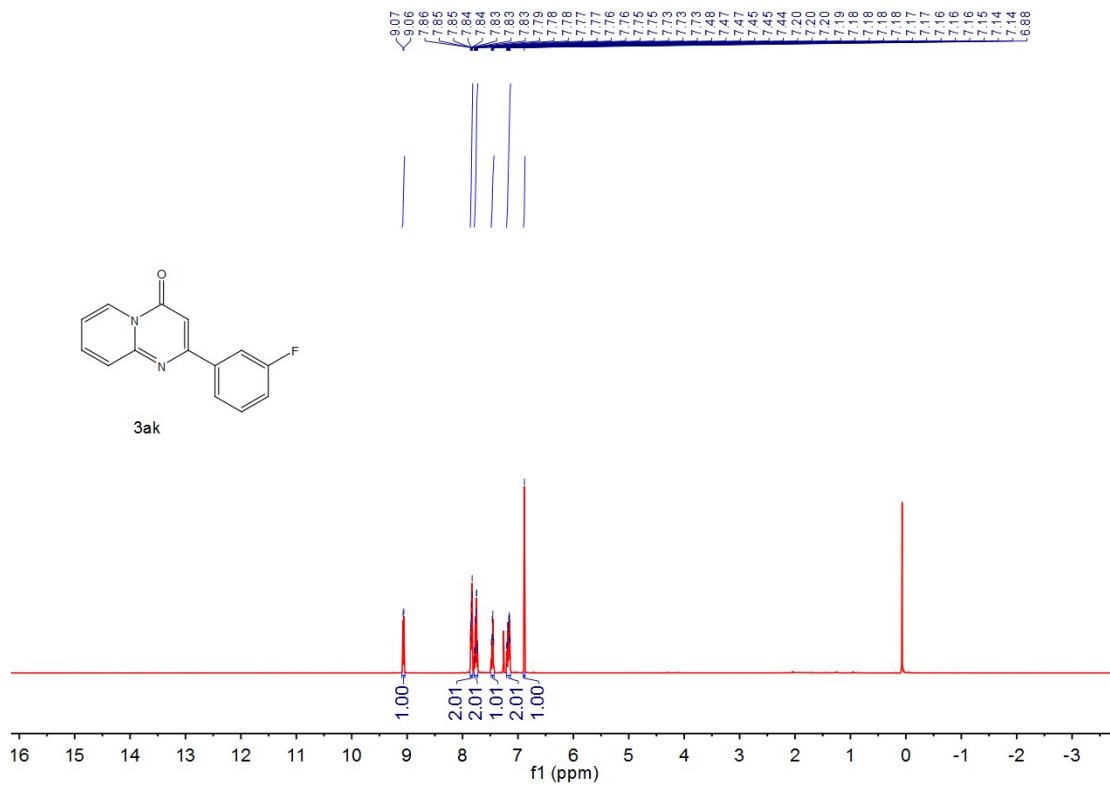

**<sup>13</sup>C spectrum of 3ak**

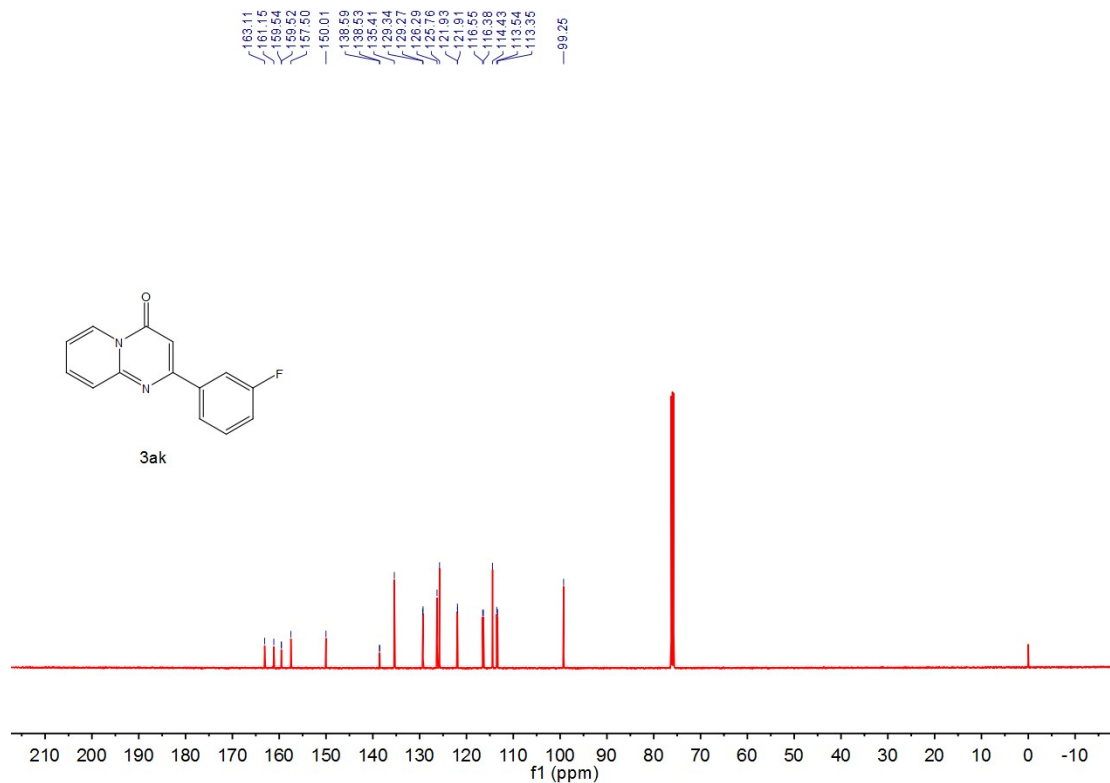

**2-(2-Fluorophenyl)-4H-pyrido[1,2-a]pyrimidin-4-one (3al)**

**<sup>1</sup>H spectrum of 3al**

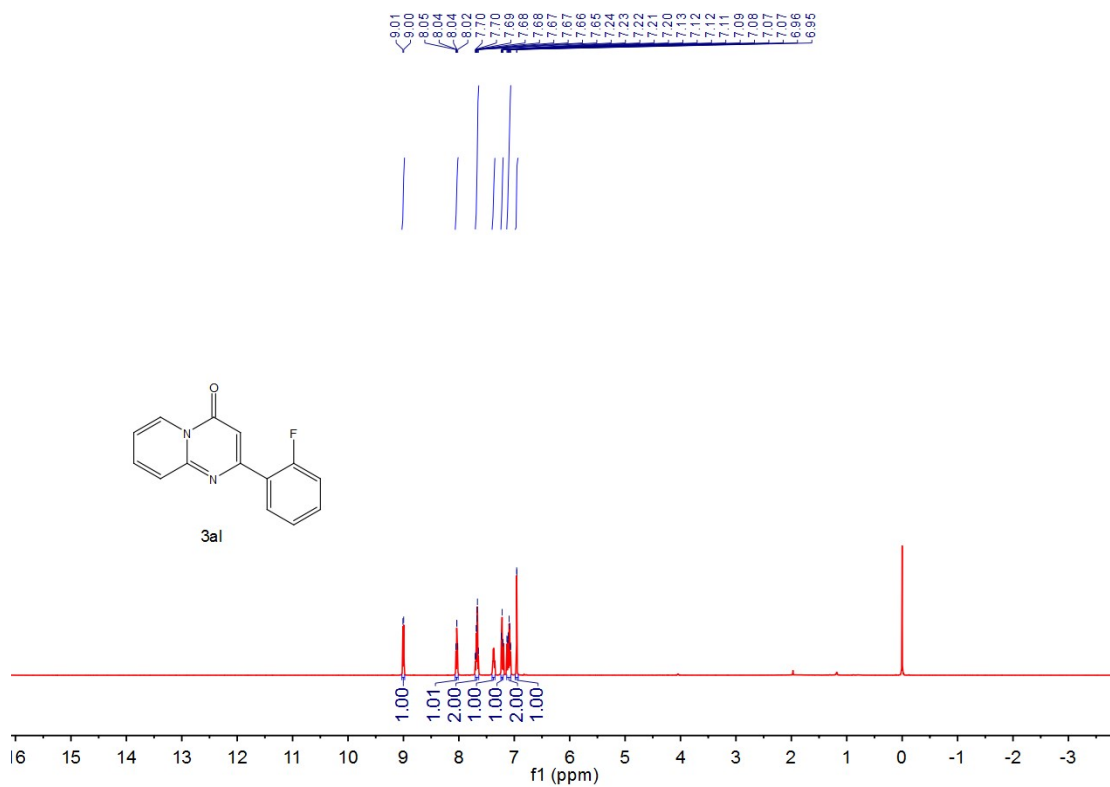

**<sup>13</sup>C spectrum of 3al**

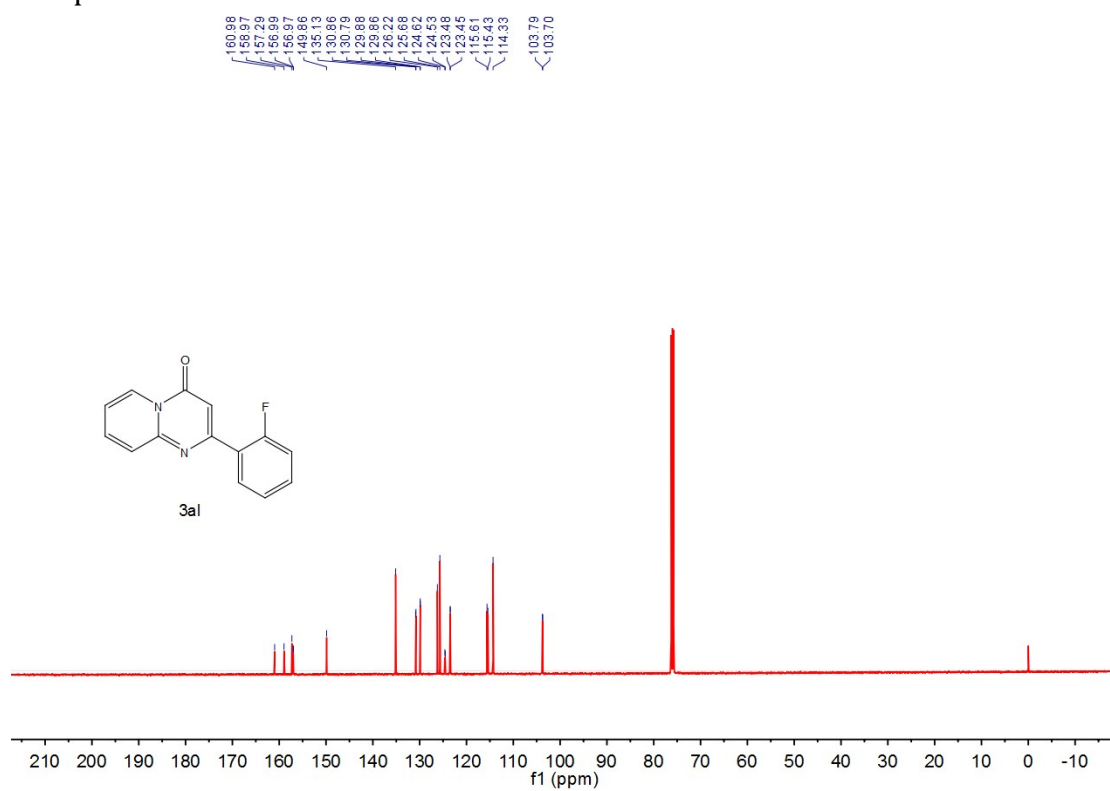

**2-(4-Bromophenyl)-4H-pyrido[1,2-a]pyrimidin-4-one(3am)**

**<sup>1</sup>H spectrum of 3am**

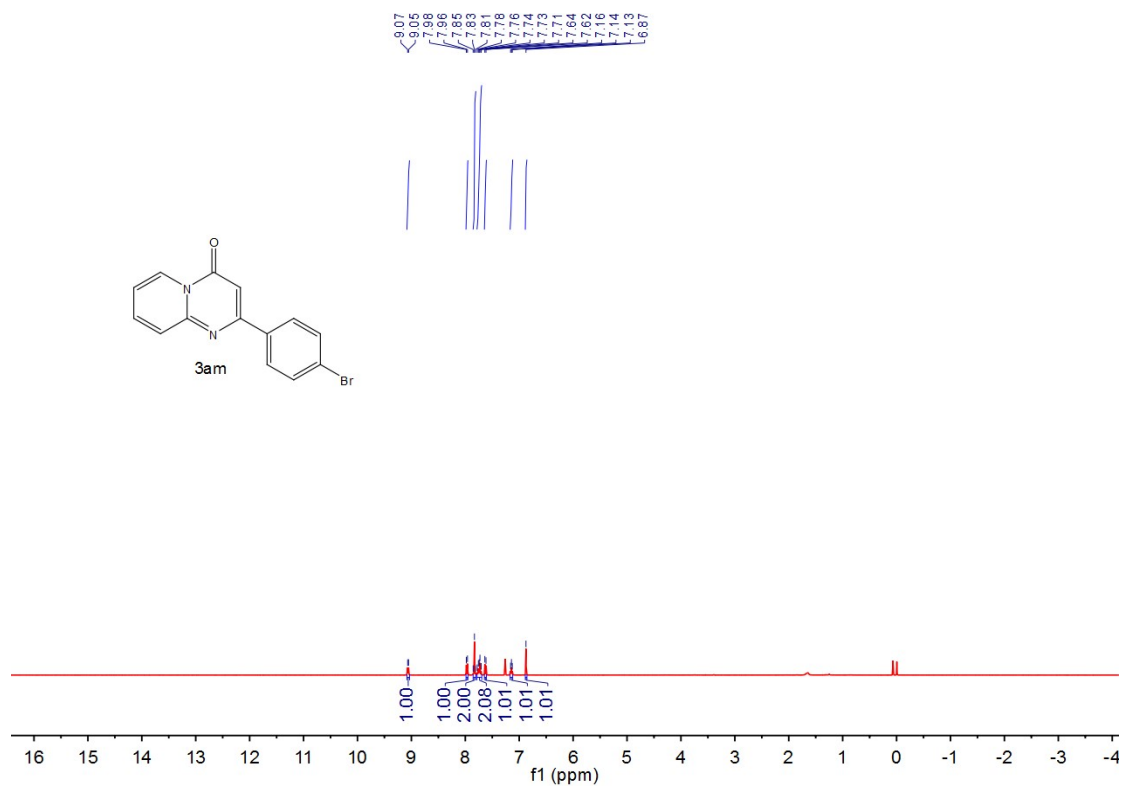

**<sup>13</sup>C spectrum of 3am**

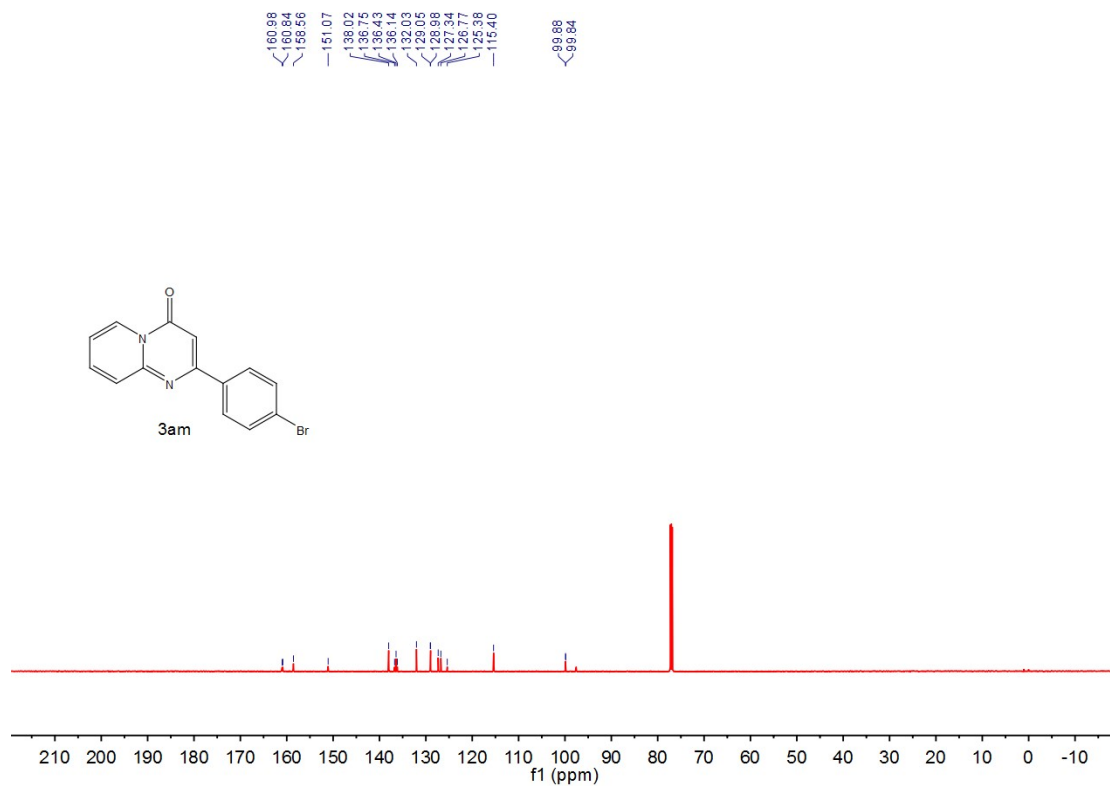

**2-(4-(Trifluoromethyl)phenyl)-4H-pyrido[1,2-a]pyrimidin-4-one(3an)**

**<sup>1</sup>H spectrum of 3an**

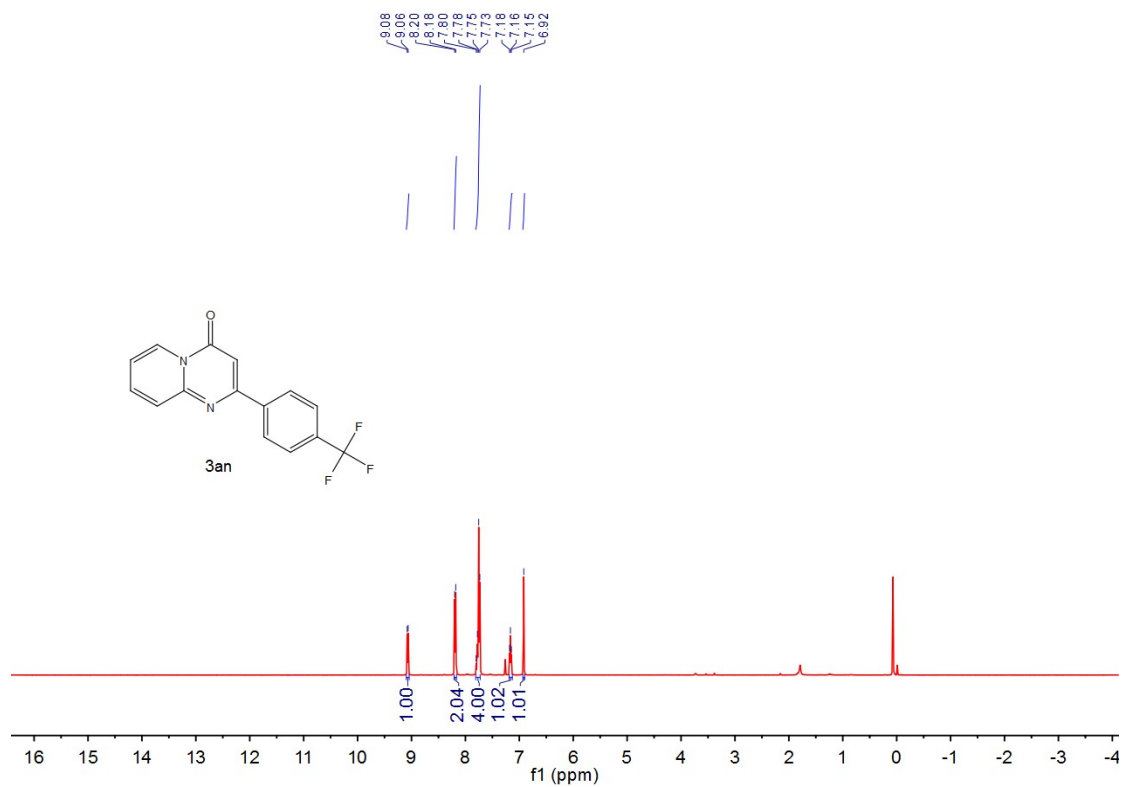

<sup>13</sup>C spectrum of **3an**

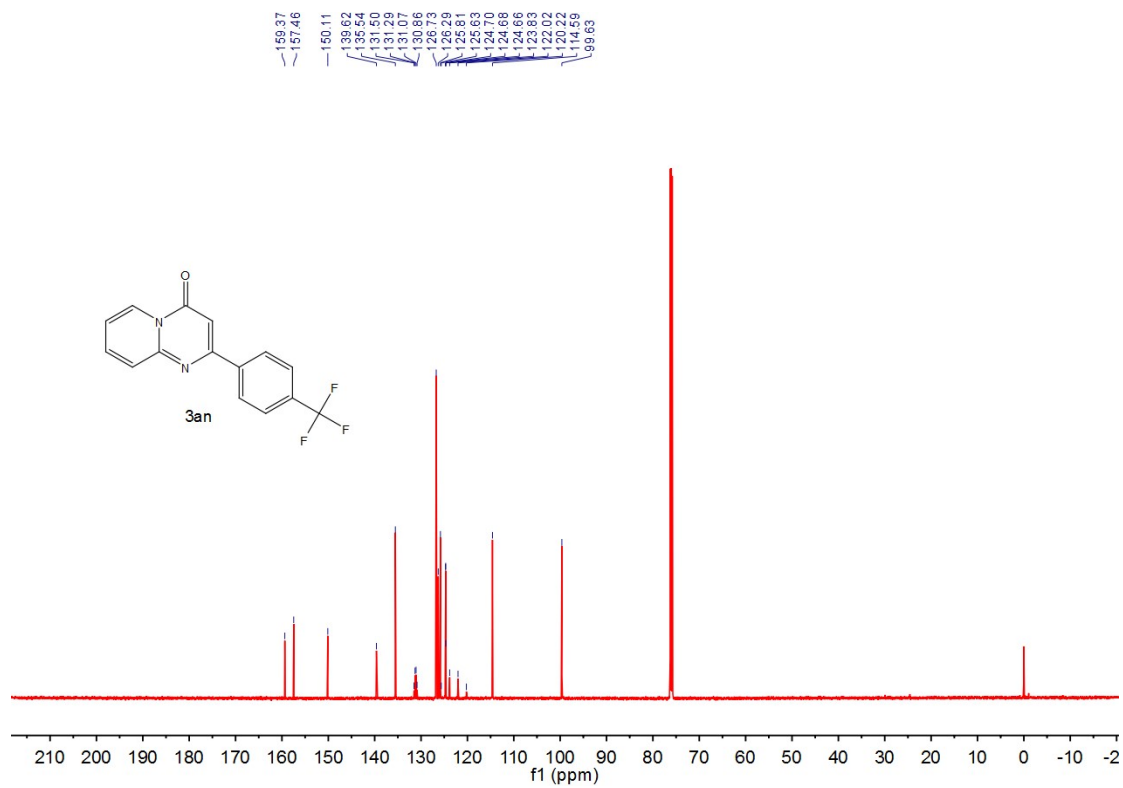

**2-(3-(Trifluoromethyl)phenyl)-4H-pyrido[1,2-a]pyrimidin-4-one(3ao)**

<sup>1</sup>H spectrum of **3ao**

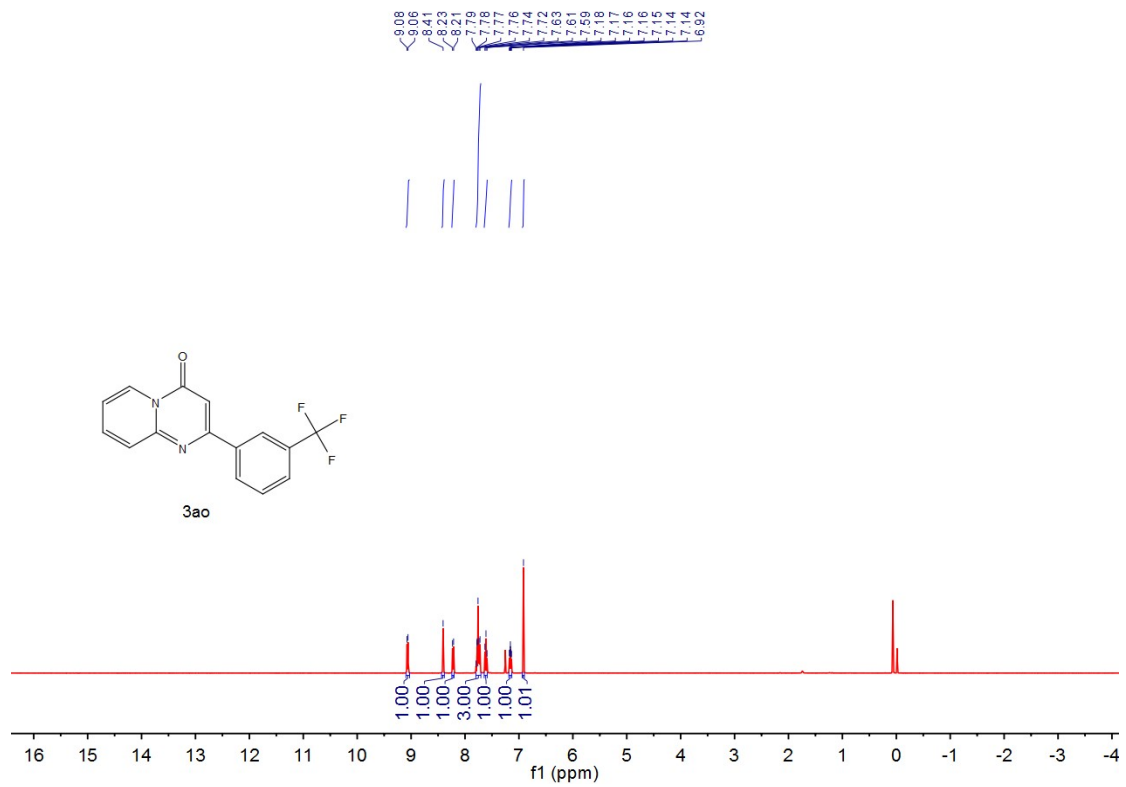

**<sup>13</sup>C spectrum of 3ao**

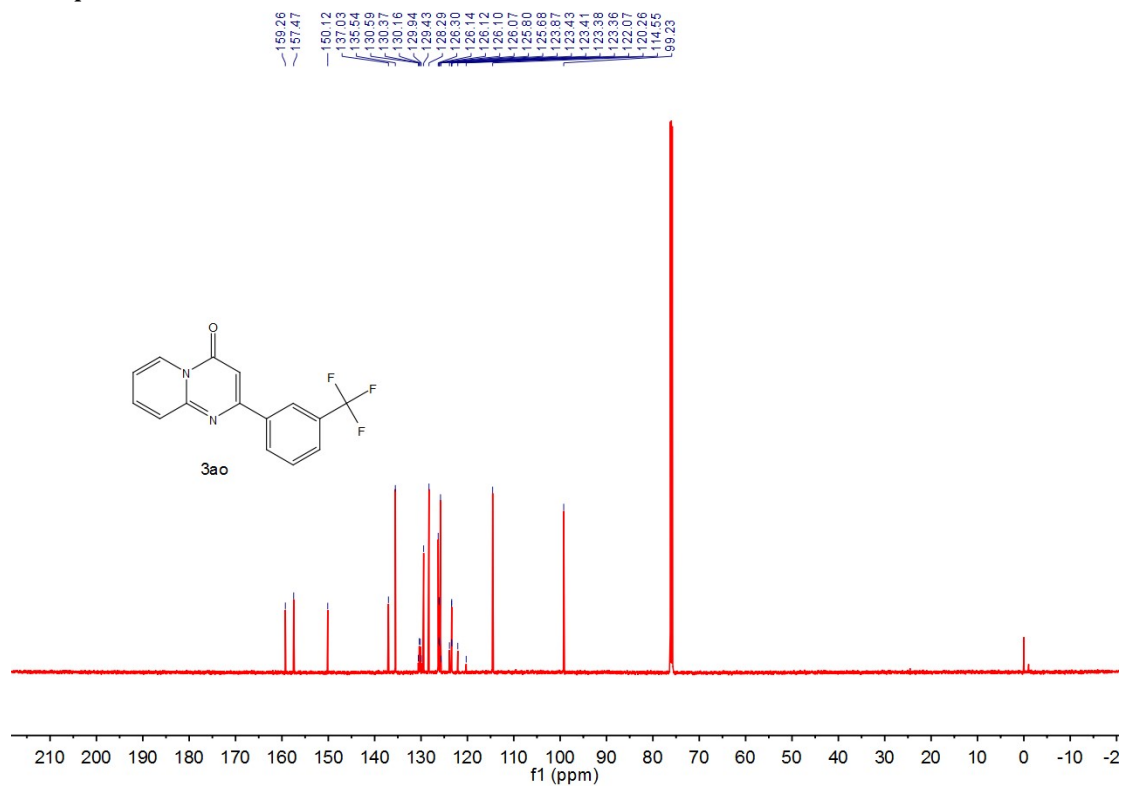

**2-Methyl-4H-pyrido[1,2-a]pyrimidin-4-one(3ap)**

**<sup>1</sup>H spectrum of 3ap**



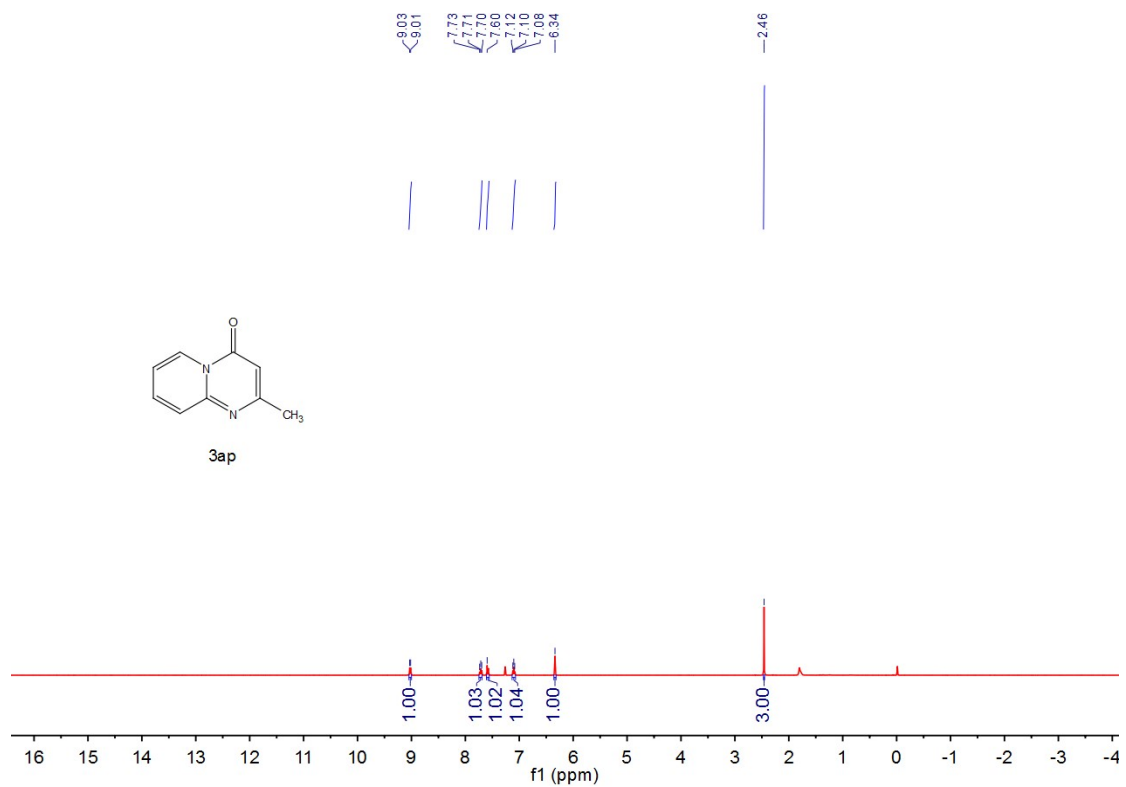

**<sup>13</sup>C spectrum of 3ap**

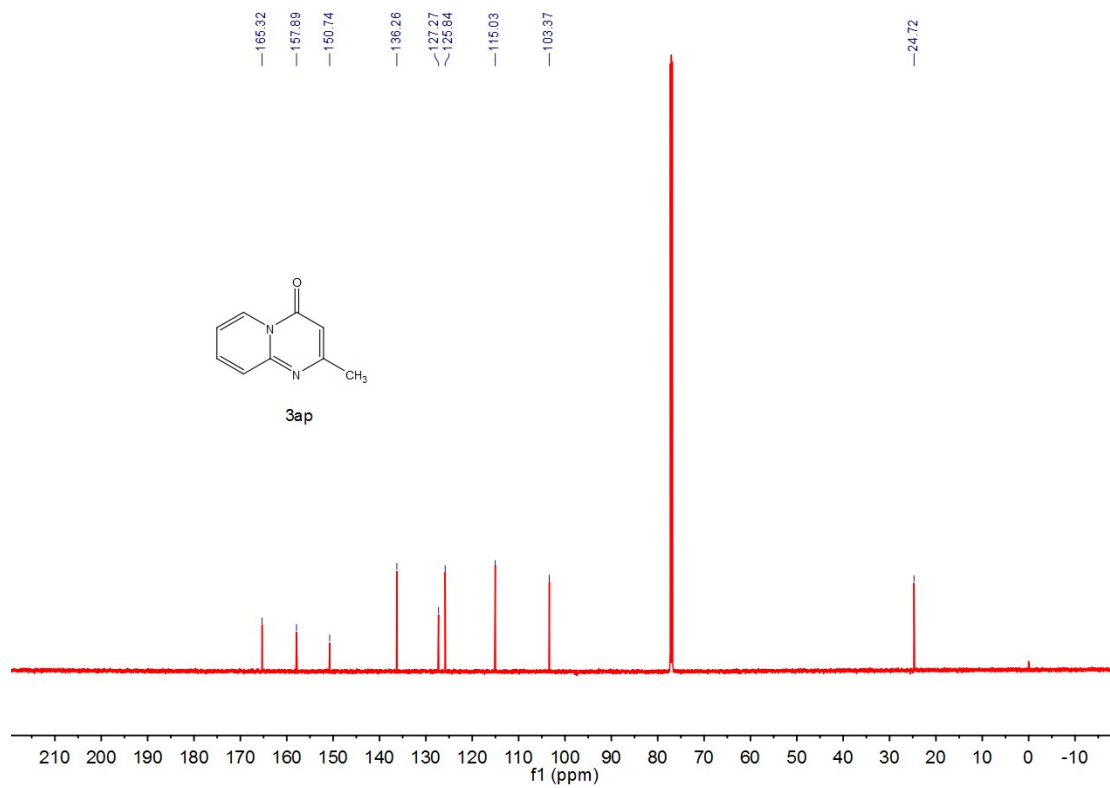

**2-Phenyl-4H-pyrido[1,2-a]pyrimidin-4-one(3ba)**

### <sup>1</sup>H spectrum of **3ba**

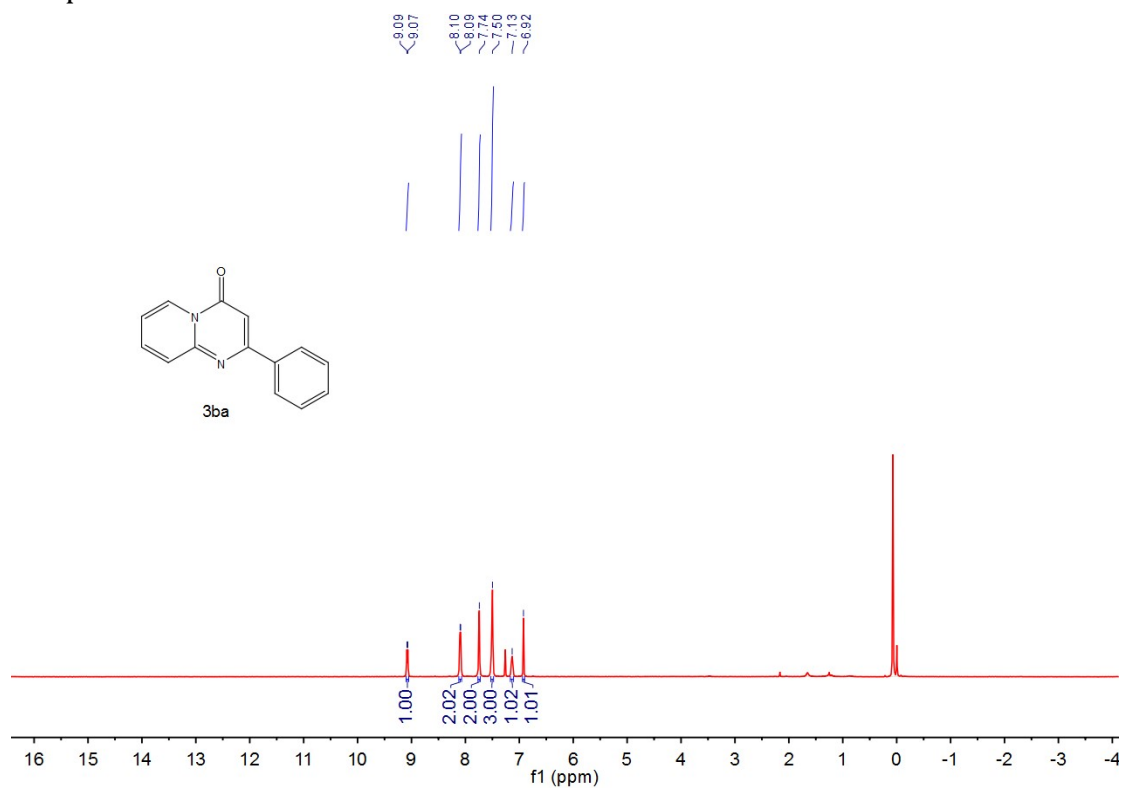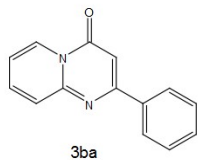

### <sup>13</sup>C spectrum of **3ba**

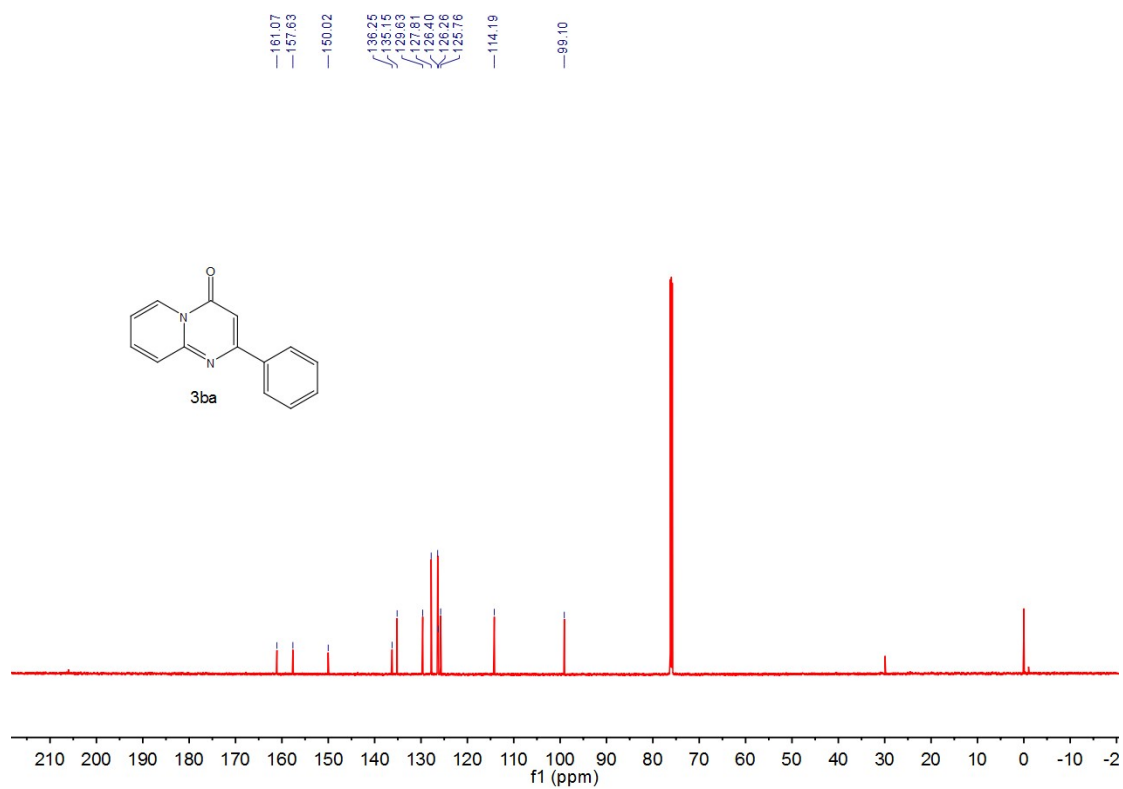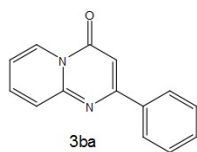

*9-Methyl-2-phenyl-4H-pyrido[1,2-a]pyrimidin-4-one(3ca)*

### <sup>1</sup>H spectrum of **3ca**

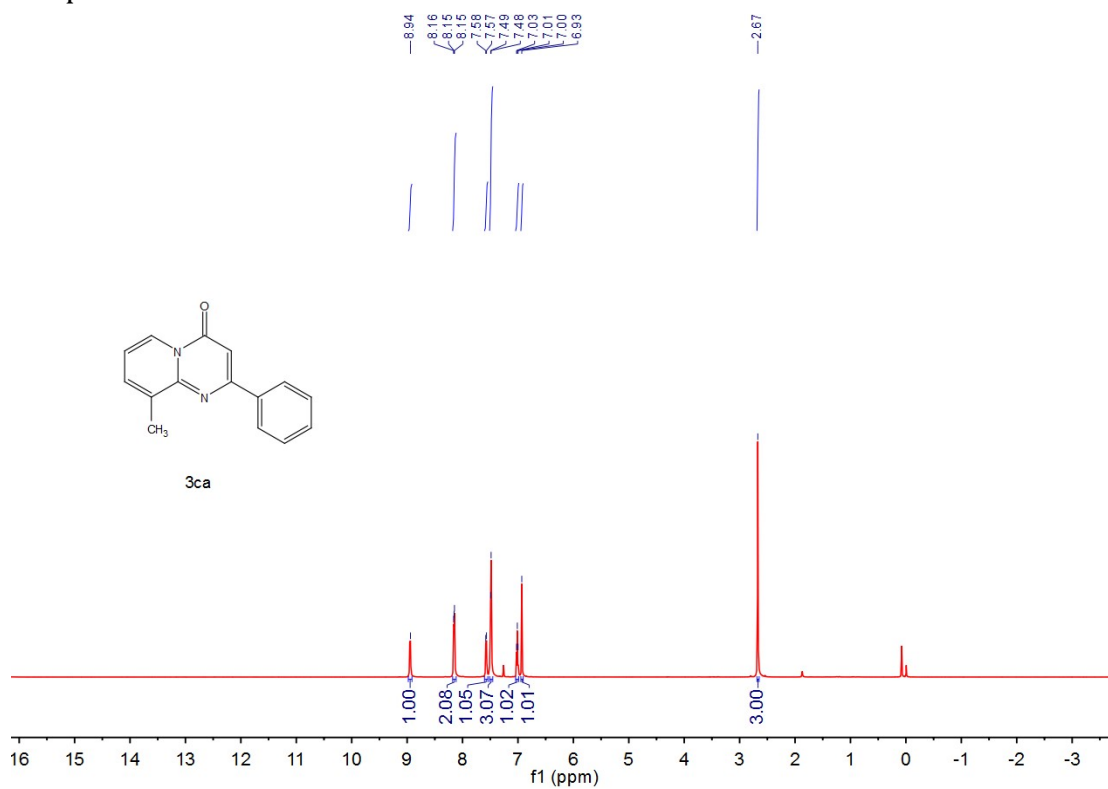

### <sup>13</sup>C spectrum of **3ca**

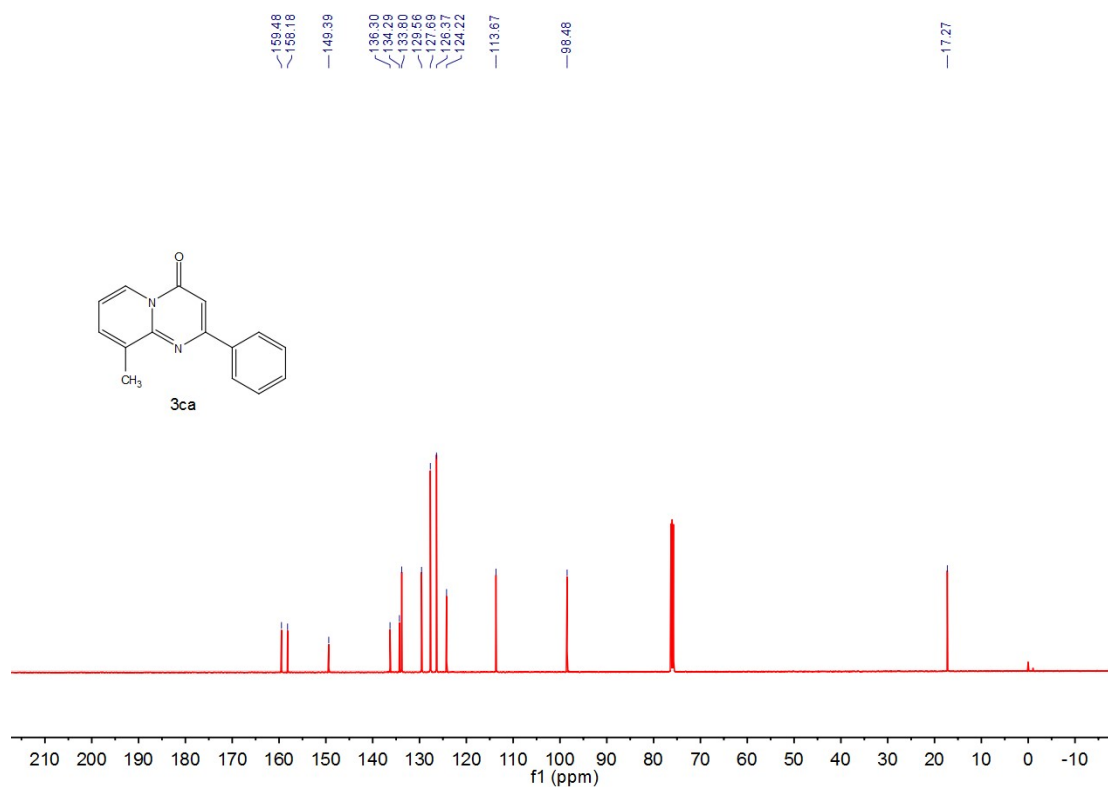

**8-Methyl-2-phenyl-4H-pyrido[1,2-a]pyrimidin-4-one(3da)**

### <sup>1</sup>H spectrum of **3da**

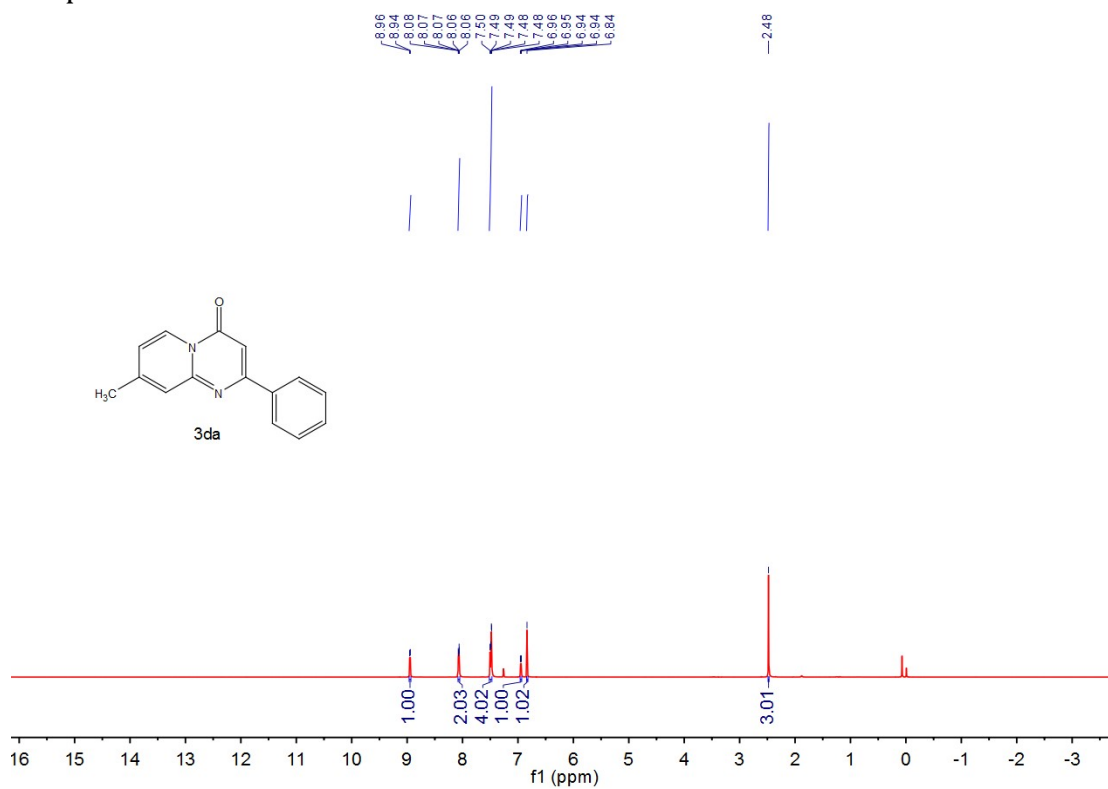

### <sup>13</sup>C spectrum of **3da**

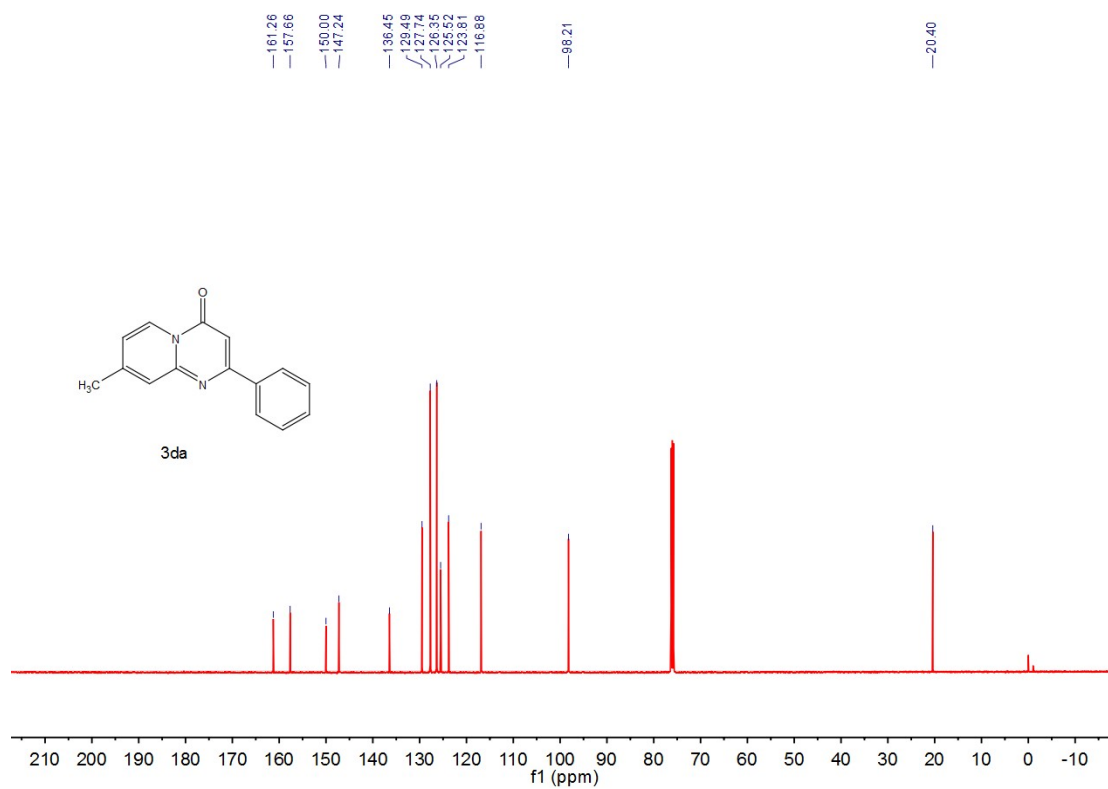

*7-Methyl-2-phenyl-4H-pyrido[1,2-a]pyrimidin-4-one*(**3ea**)

### <sup>1</sup>H spectrum of **3ea**

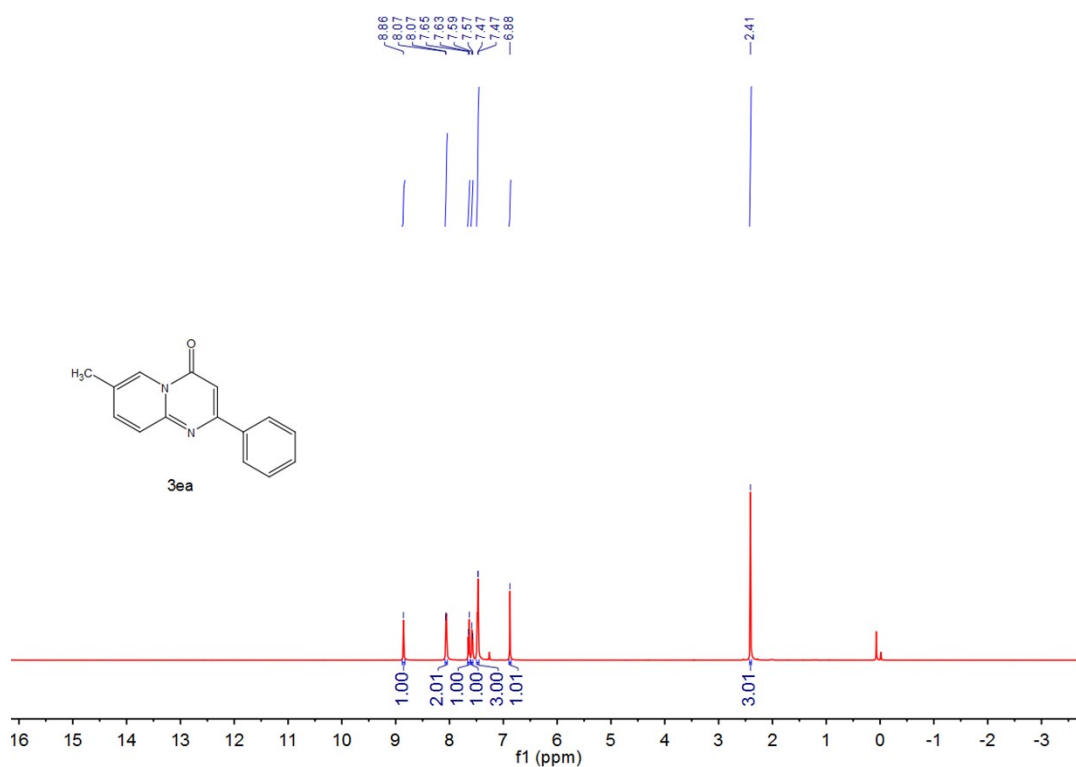

### <sup>13</sup>C spectrum of **3ea**

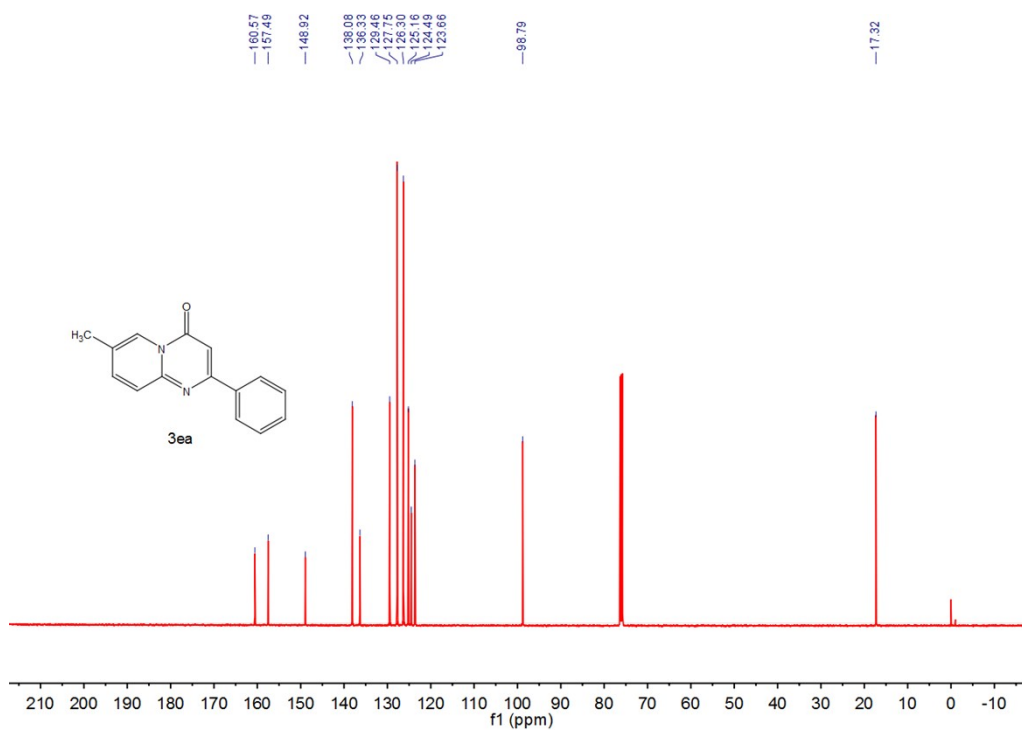

### 8-Methoxy-2-phenyl-4H-pyrido[1,2-a]pyrimidin-4-one (**3fa**)

### <sup>1</sup>H spectrum of **3fa**

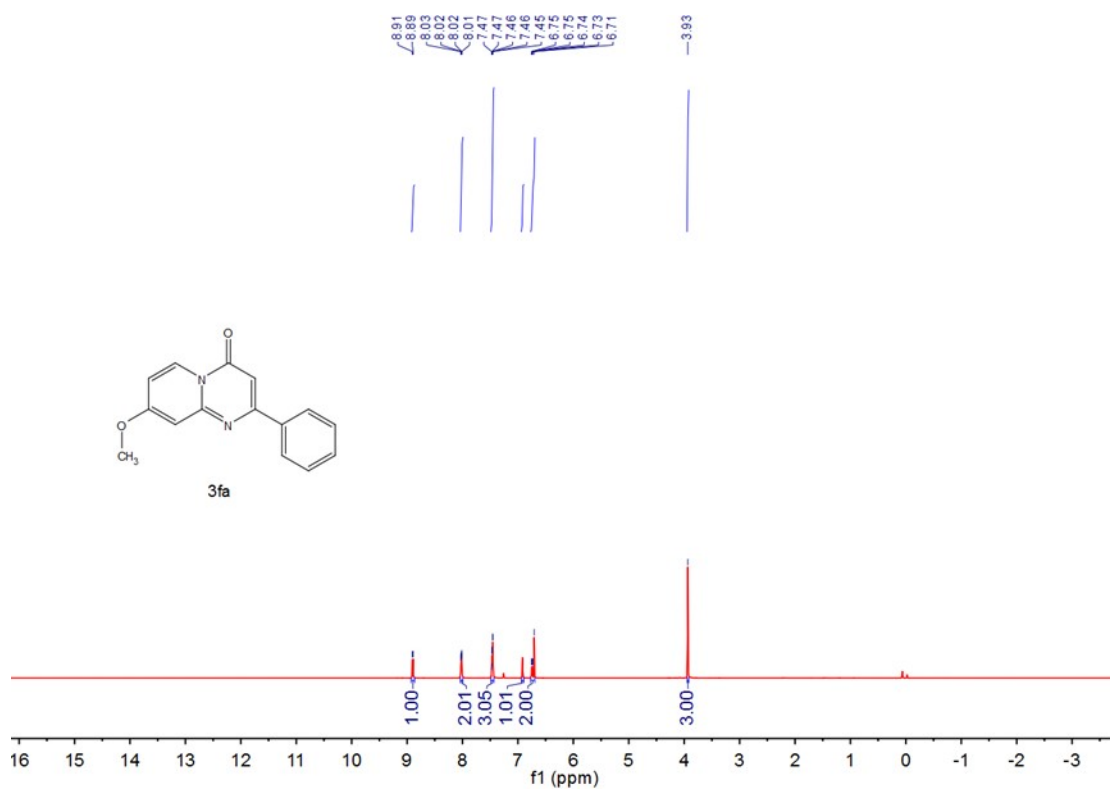

### <sup>13</sup>C spectrum of **3fa**

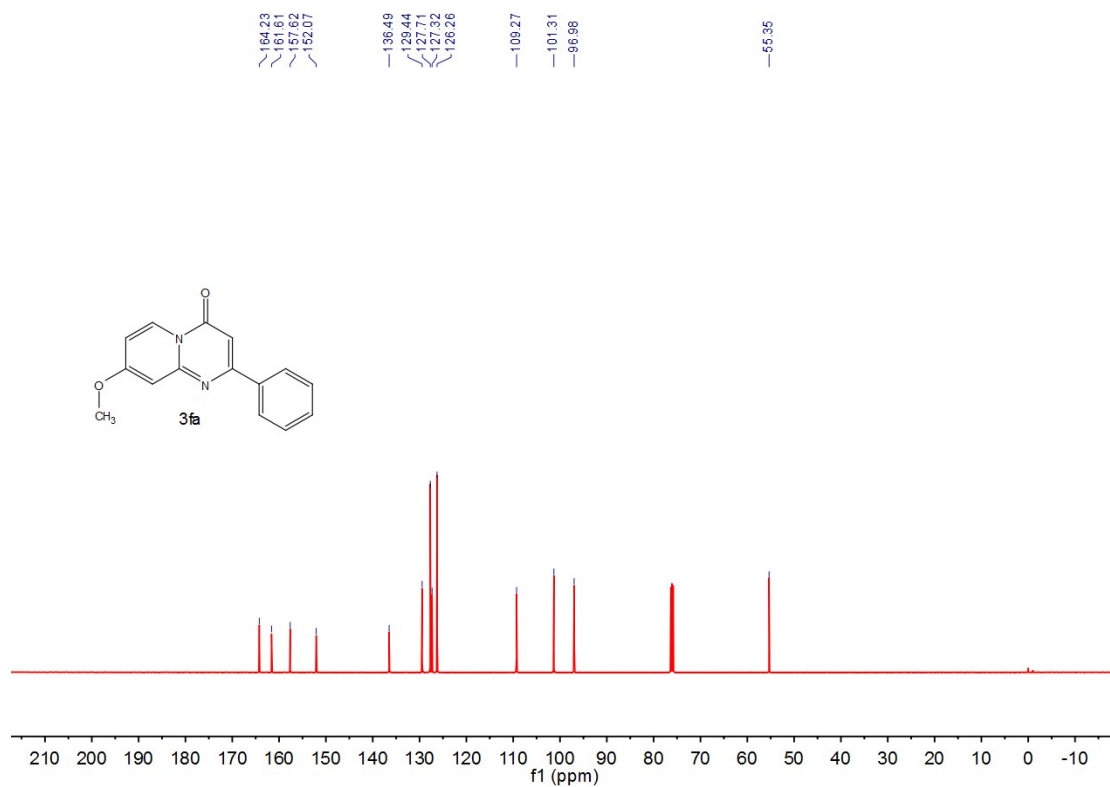

### 9-Methoxy-2-phenyl-4H-pyrido[1,2-a]pyrimidin-4-one (**3ga**)

### $^1\text{H}$ spectrum of **3ga**

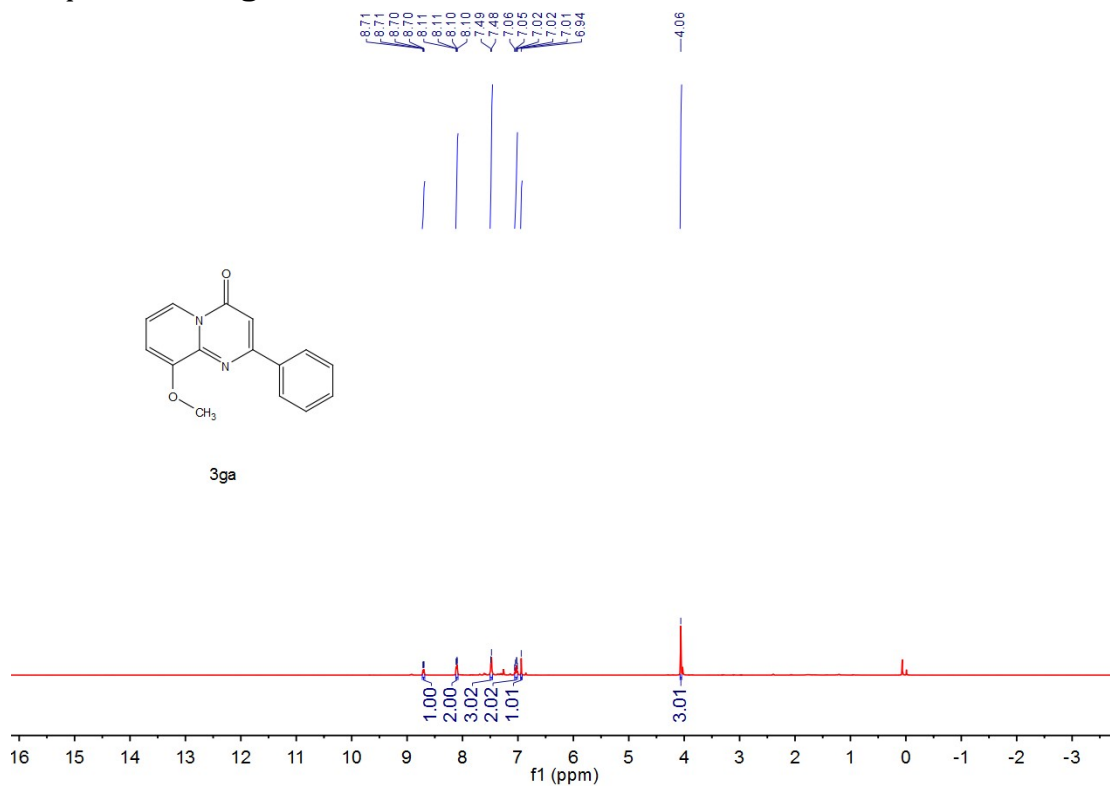

### $^{13}\text{C}$ spectrum of **3ga**

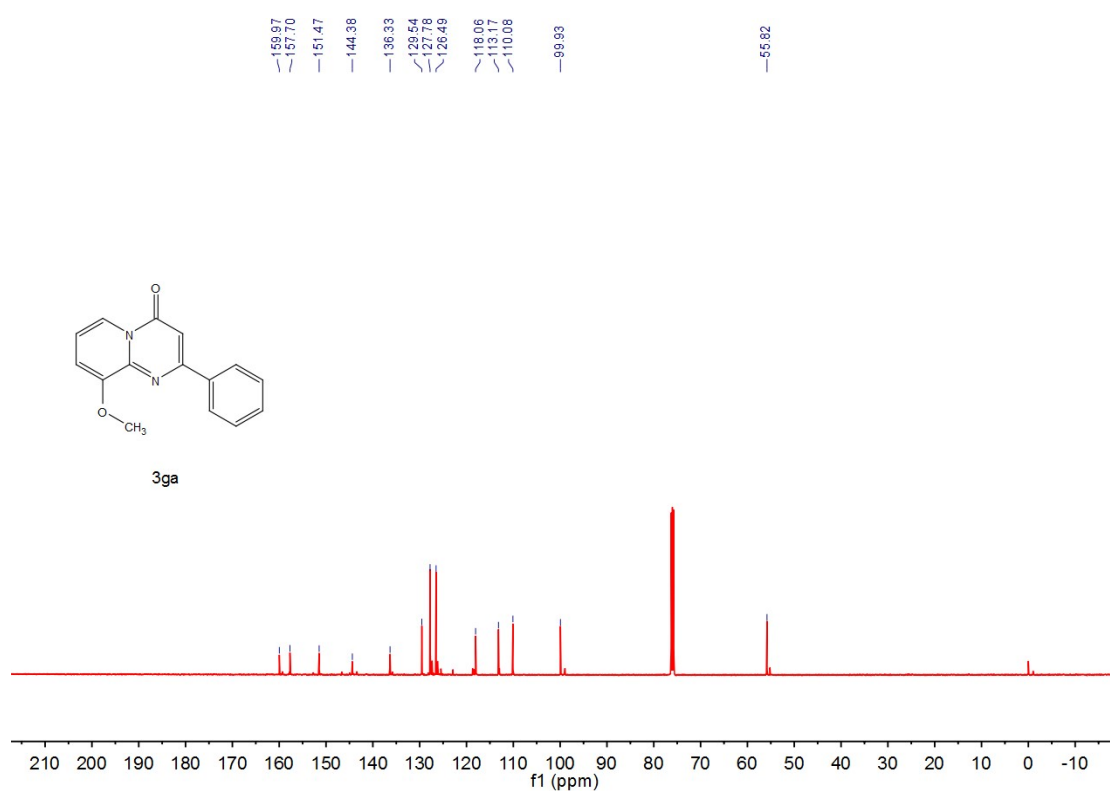

### 7-Methoxy-2-phenyl-4H-pyrido[1,2-a]pyrimidin-4-one (**3ha**)

### $^1\text{H}$ spectrum of **3ha**

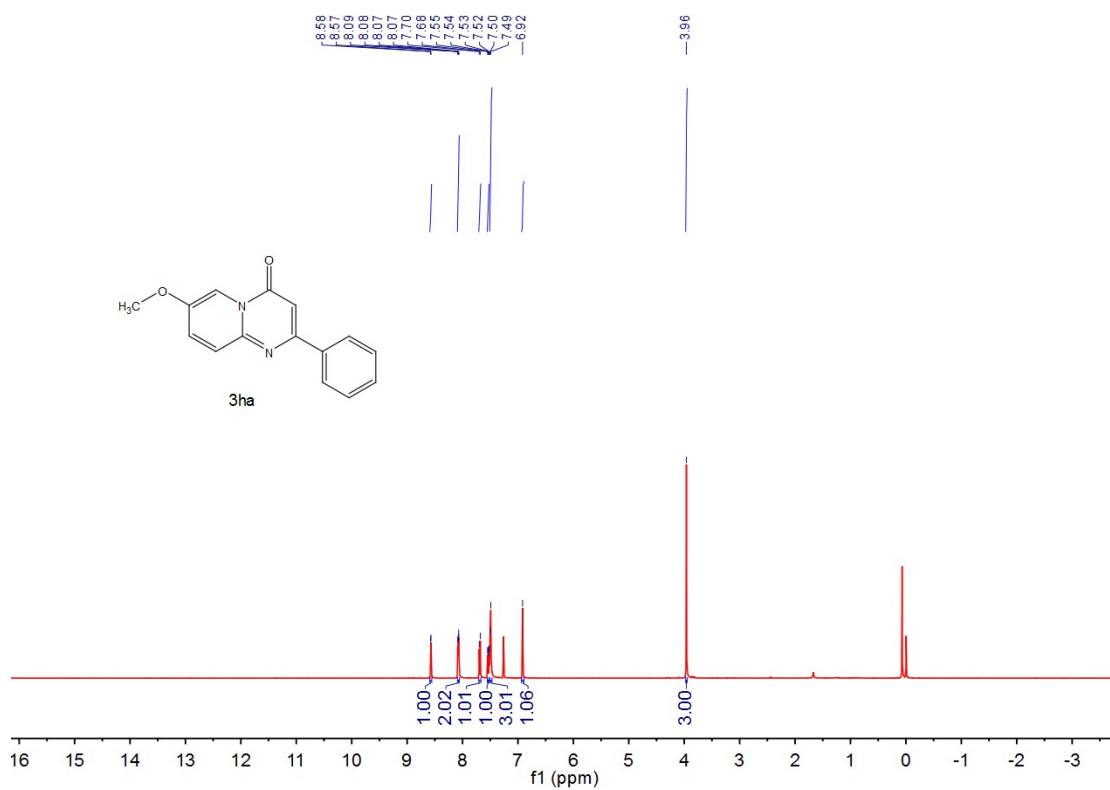

**<sup>13</sup>C spectrum of 3ha**

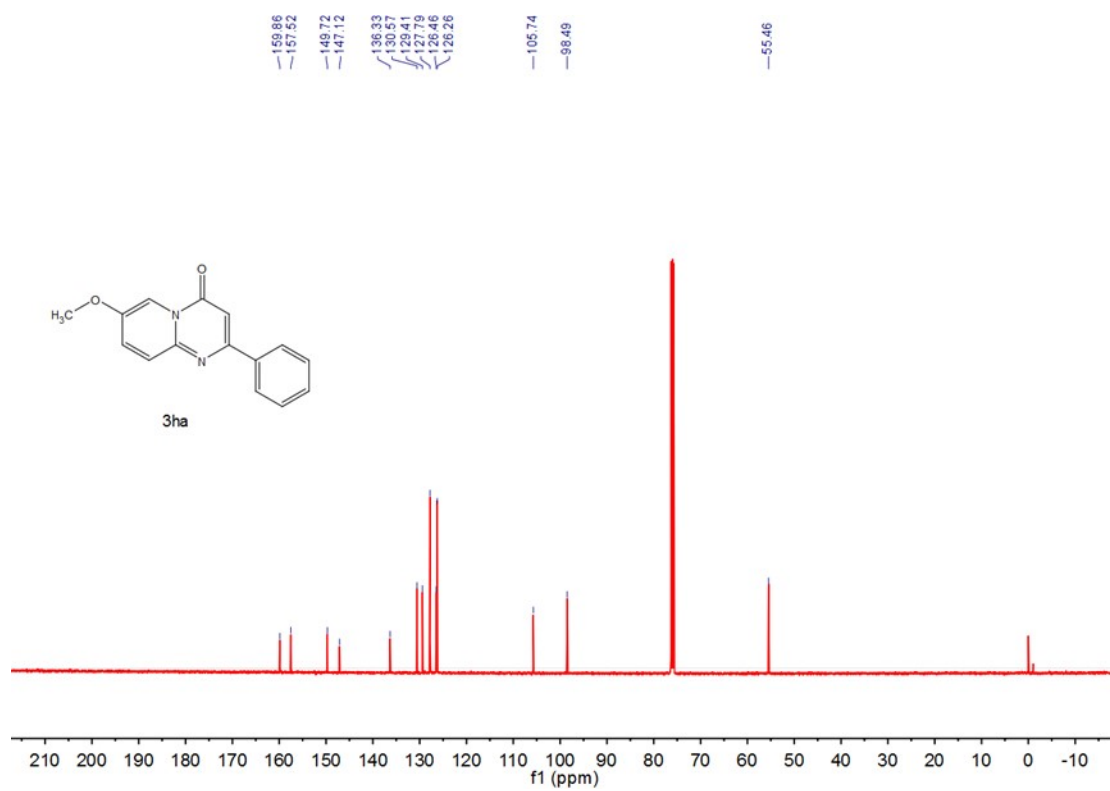

**7-Chloro-2-phenyl-4H-pyrido[1,2-a]pyrimidin-4-one(3ia)**

**<sup>1</sup>H spectrum of 3ia**



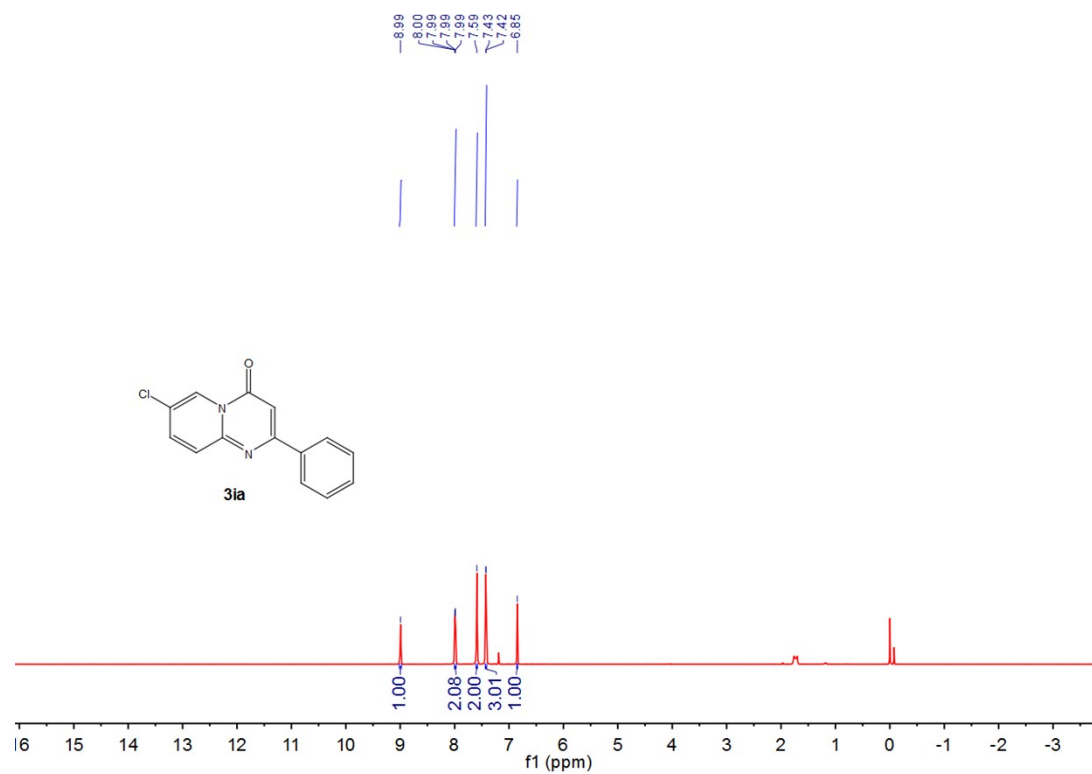

<sup>13</sup>C spectrum of 3ja

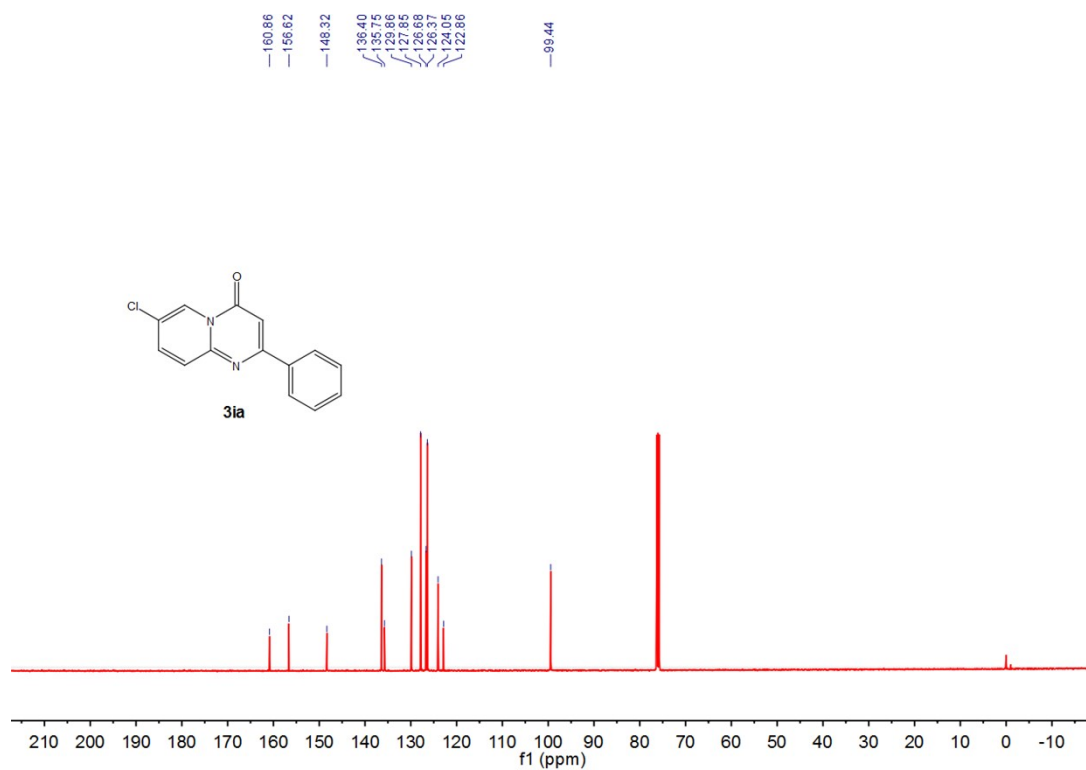

**3-Phenyl-1H-pyrimido[1,2-a]quinolin-1-one(3ja)**

<sup>1</sup>H spectrum of 3ja

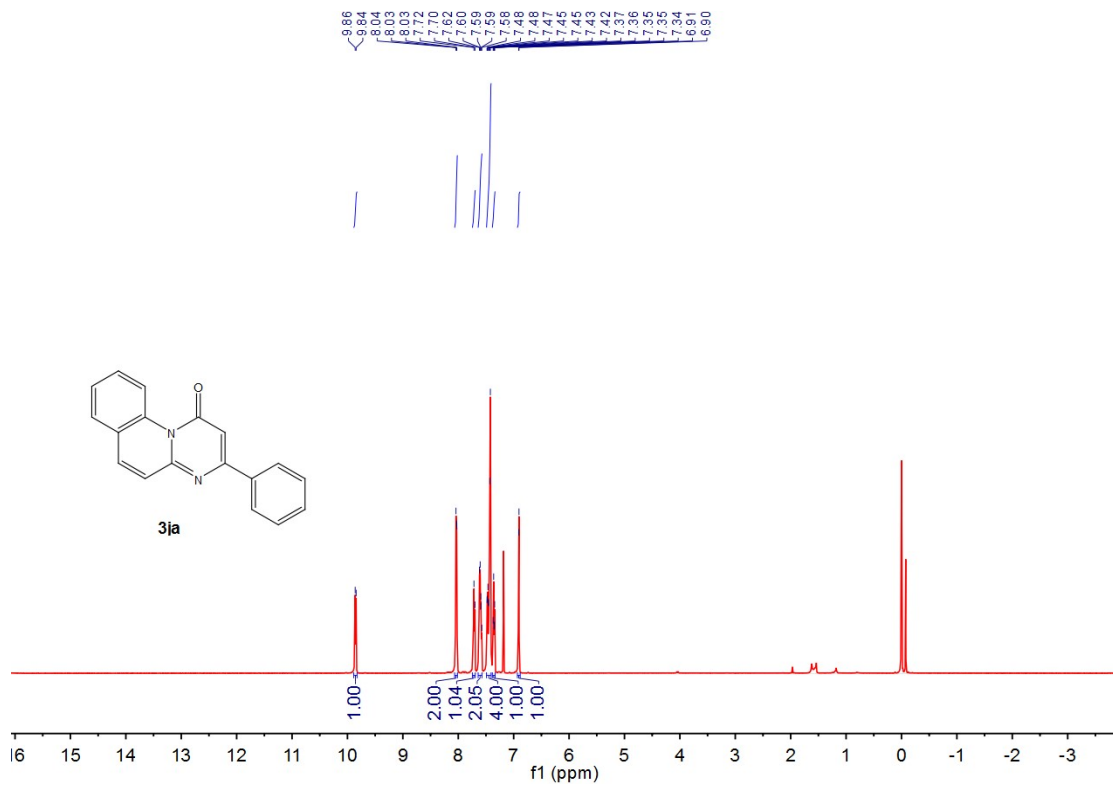

<sup>13</sup>C spectrum of **3ja**

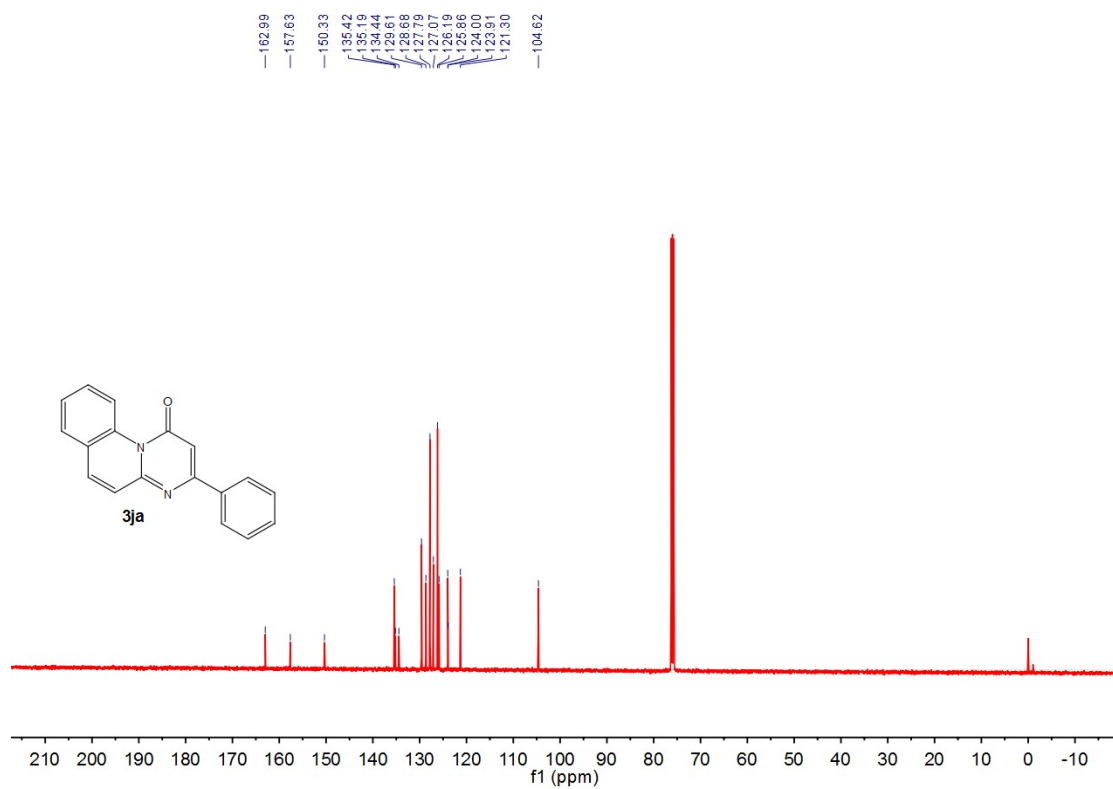

## 2. High-resolution mass spectra of new compounds

### 2-(3-Fluorophenyl)-4H-pyrido[1,2-a]pyrimidin-4-one(3ak)

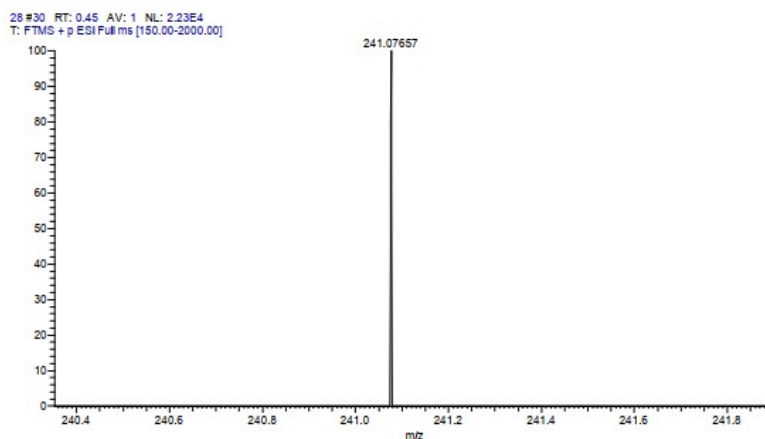

### 2-(2-Fluorophenyl)-4H-pyrido[1,2-a]pyrimidin-4-one(3al)

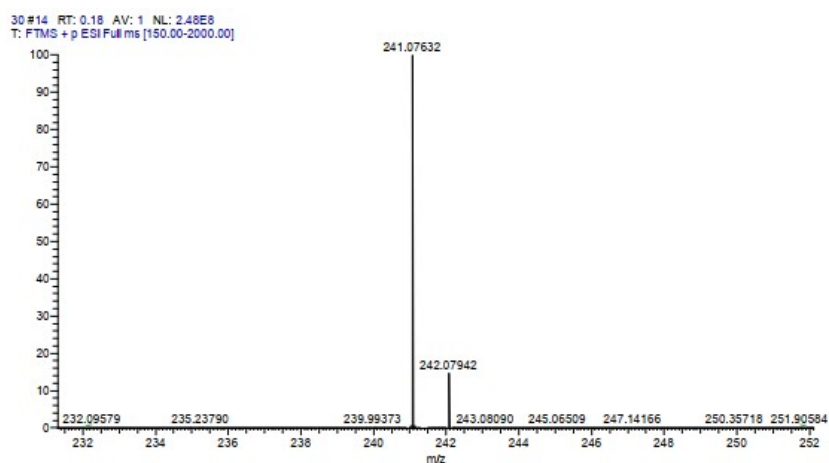

### 2-(3-(Trifluoromethyl)phenyl)-4H-pyrido[1,2-a]pyrimidin-4-one(3ao)

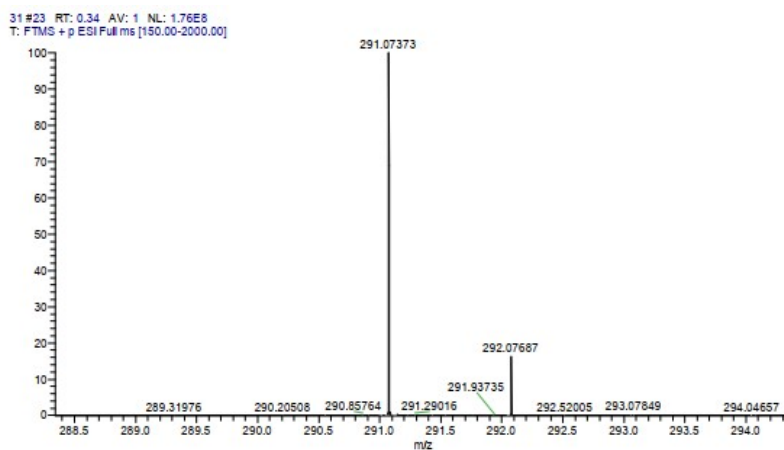

**8-Methoxy-2-phenyl-4H-pyrido[1,2-a]pyrimidin-4-one(3fa)**

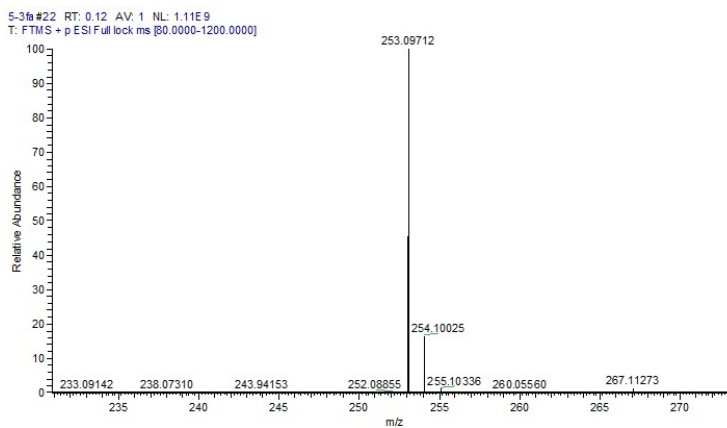

**9-Methoxy-2-phenyl-4H-pyrido[1,2-a]pyrimidin-4-one(3ga)**

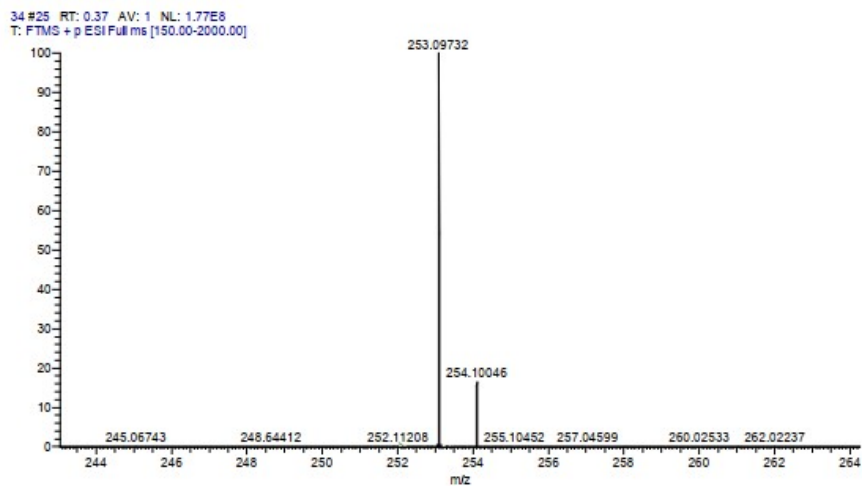

**7-Methoxy-2-phenyl-4H-pyrido[1,2-a]pyrimidin-4-one(3ha)**

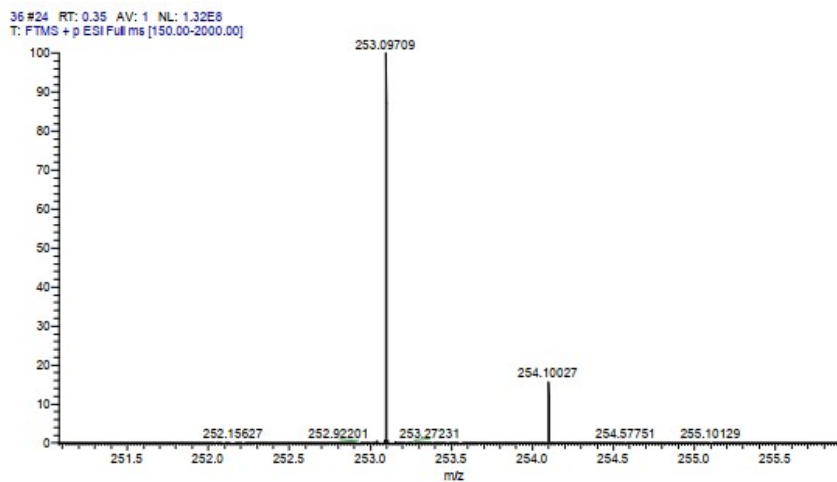

### 3. IR spectra of new compounds

#### 2-(3-Fluorophenyl)-4H-pyrido[1,2-a]pyrimidin-4-one(3ak)

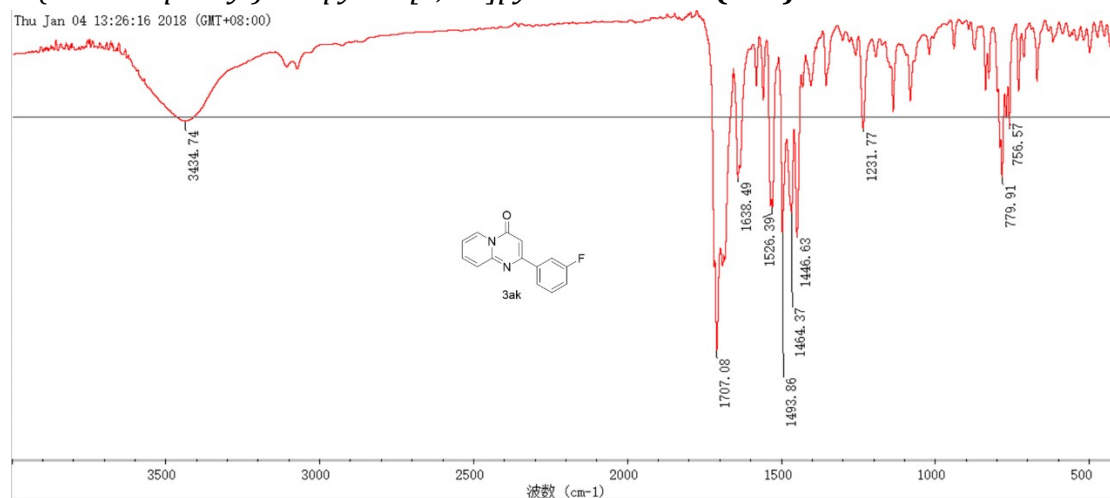

#### 2-(2-Fluorophenyl)-4H-pyrido[1,2-a]pyrimidin-4-one(3al)

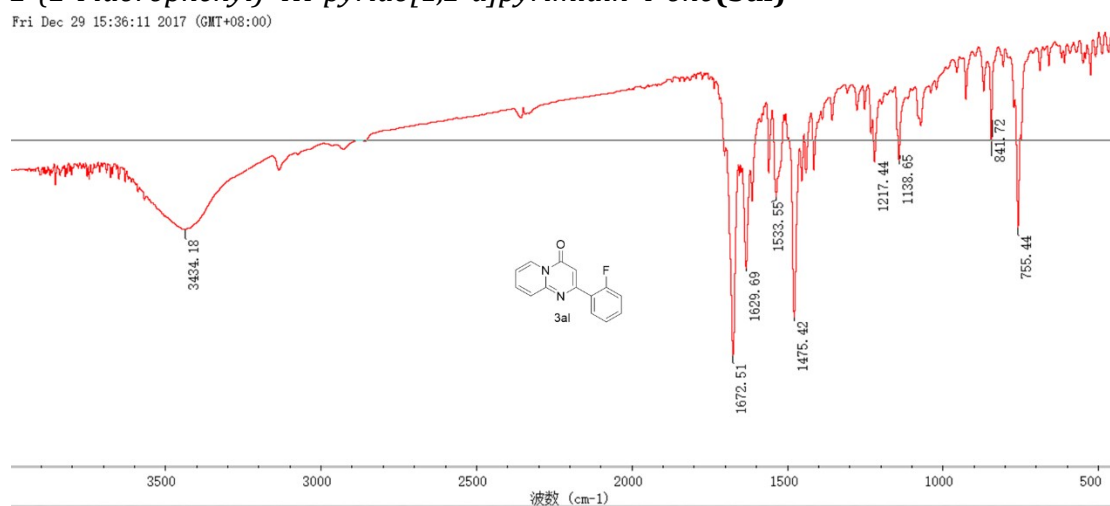

#### 2-(3-(Trifluoromethyl)phenyl)-4H-pyrido[1,2-a]pyrimidin-4-one(3ao)

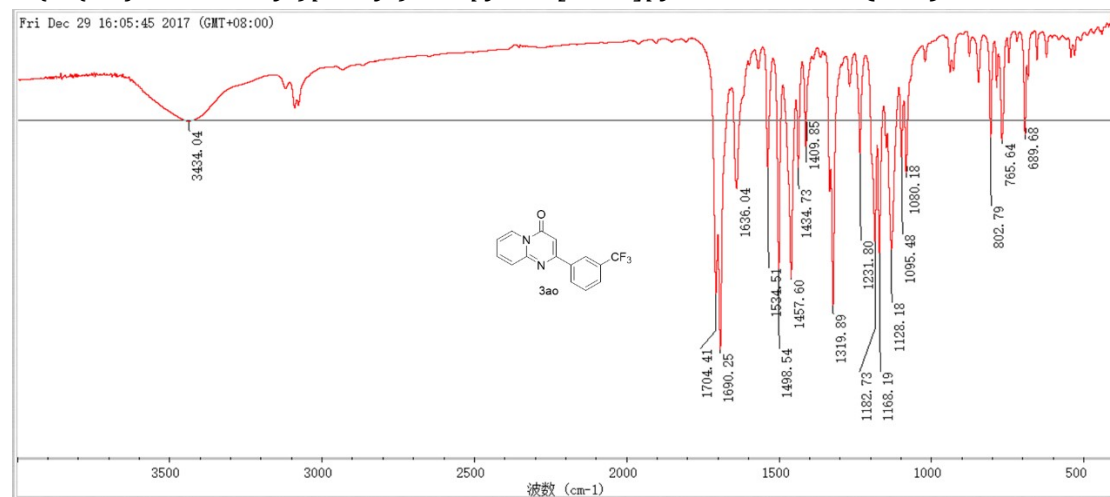

### 8-Methoxy-2-phenyl-4H-pyrido[1,2-a]pyrimidin-4-one(3fa)

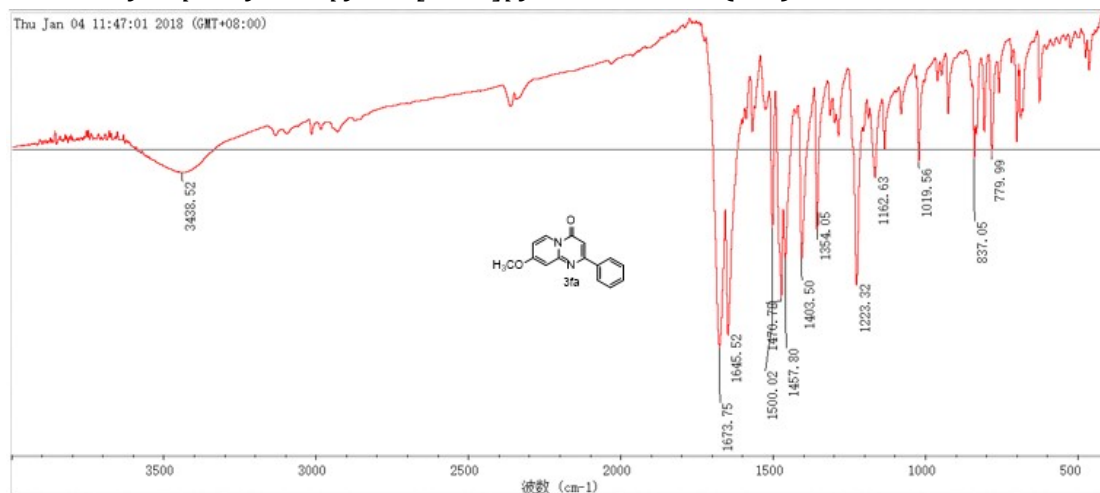

### 9-Methoxy-2-phenyl-4H-pyrido[1,2-a]pyrimidin-4-one(3ga)

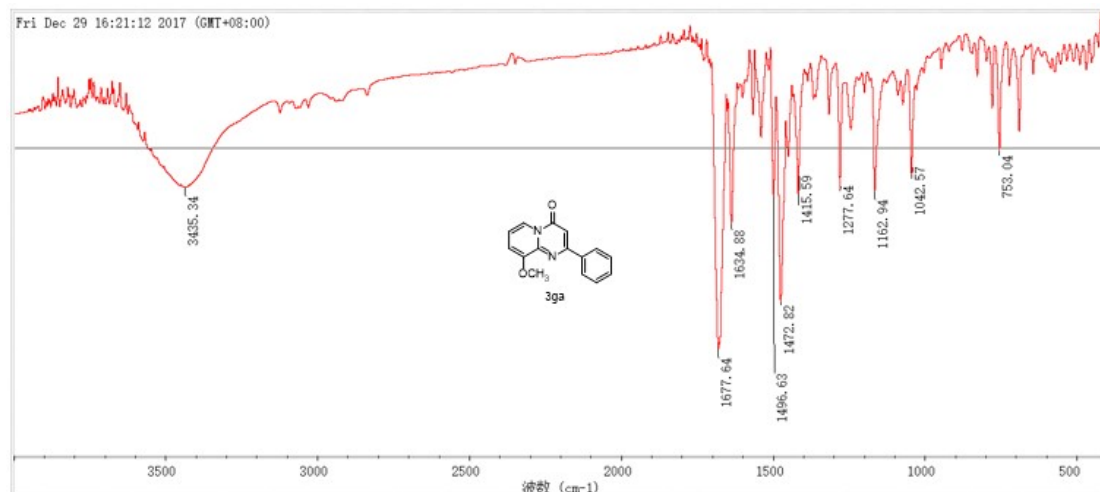

### 7-Methoxy-2-phenyl-4H-pyrido[1,2-a]pyrimidin-4-one(3ha)

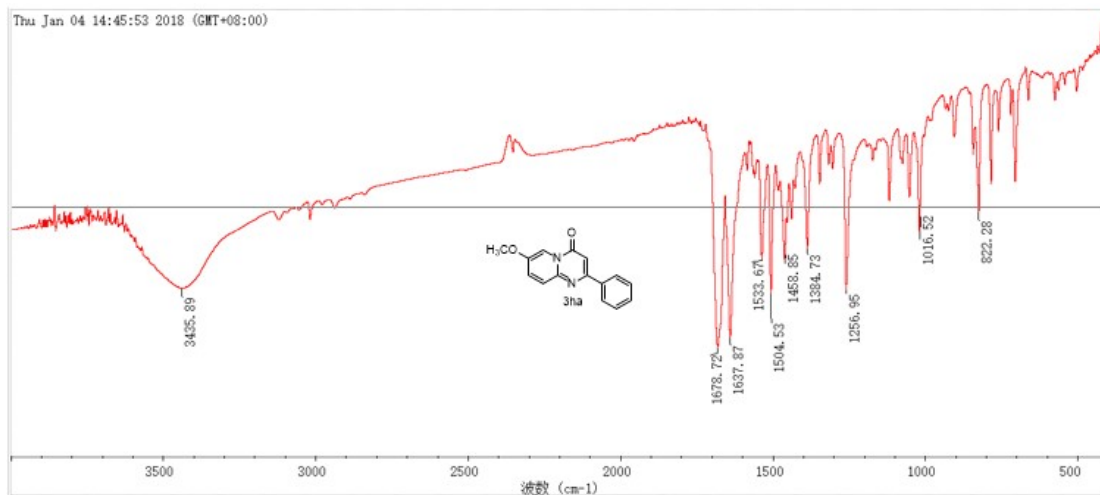

Supplement: d3ra04454h1.pdf [file d3ra04454h1.pdf]
